# Supplementary material for: Theoretical prediction of Am(iii)/Eu(iii) selectivity to aid the design of actinide-lanthanide separation agents
Source: Royal Society of Chemistry journal article supplement (doi:10.1039/c4dt03275f), 2015-01-01
Supplement: c4dt03275f1.pdf [file c4dt03275f1.pdf]

**Supporting Information for**

**Theoretical Prediction of Am(III)/Eu(III) Selectivity to Aid the  
Design of Actinide-Lanthanide Separation Agents**

Vyacheslav S. Bryantsev,\* Benjamin P. Hay<sup>1</sup>

*Oak Ridge National Laboratory, Chemical Sciences Division, 1 Bethel Valley Rd., Oak Ridge,  
Tennessee, USA 37831-6119*

*<sup>1</sup>Present Address: Supramolecular Design Institute, 127 Chestnut Hill Rd., Oak Ridge,  
Tennessee, USA 37830-7185*

**Electronic Supplementary Information (ESI) Available:** Complete reference 39, additional computational details, calculated bond distances to Am<sup>3+</sup> and Eu<sup>3+</sup>, gas-phase interaction energies with La<sup>3+</sup>, structures of the selected optimized complexes, optimized geometries and absolute energies (in Hartrees) for all metal-ion complexes obtained at the B3LYP level.

**Complete Reference 39.** M. J. Frisch, G. W. Trucks, H. B. Schlegel, G. E. Scuseria, M. A. Robb, J. R. Cheeseman, G. Scalmani, V. Barone, B. Mennucci, G. A. Petersson, H. Nakatsuji, M. Caricato, X. Li, H. P. Hratchian, A. F. Izmaylov, J. Bloino, G. Zheng, J. L. Sonnenberg, M. Hada, M. Ehara, K. Toyota, R. Fukuda, J. Hasegawa, M. Ishida, T. Nakajima, Y. Honda, O. Kitao, H. Nakai, T. Vreven, J. A. Montgomery, Jr., J. E. Peralta, F. Ogliaro, M. Bearpark, J. J. Heyd, E. Brothers, K. N. Kudin, V. N. Staroverov, R. Kobayashi, J. Normand, K. Raghavachari, A. Rendell, J. C. Burant, S. S. Iyengar, J. Tomasi, M. Cossi, N. Rega, J. M. Millam, M. Klene, J. E. Knox, J. B. Cross, V. Bakken, C. Adamo, J. Jaramillo, R. Gomperts, R. E. Stratmann, O. Yazyev, A. J. Austin, R. Cammi, C. Pomelli, J. W. Ochterski, R. L. Martin, K. Morokuma, V. G. Zakrzewski, G. A. Voth, P. Salvador, J. J. Dannenberg, S. Dapprich, A. D. Daniels, Ö. Farkas, J. B. Foresman, J. V. Ortiz, J. Cioslowski, and D. J. Fox, *Gaussian 09, Revision C.01*, Gaussian, Inc., Wallingford CT, 2009.

**Additional Computational Details.** For metal ion-ligand complexes with fused aromatic rings (ligands **9** and **10**), the SP diffuse basis function on carbon caused a singularity in the Pulay matrix using NWChem 6.3<sup>1</sup> software, leading to a problem of self-consistent field (SCF) convergence. We were able to get the converged wavefunctions for complexes with **9** and **10** by increasing an exponent of the most diffuse SP function of carbon from 0.0438 to 0.0738. Control calculations for complex with **1b** show that this procedure leads to only 0.09 kcal/mol decrease in Am/Eu selectivity when compared to results obtained with the standard 6-311++G\*\* basis set. Geometries were optimized at each basis set and density functions, with the exception of M06 and M06-L, for which the addition of diffuse functions can cause numerical instabilities and fluctuations in gradient and energy during geometry optimization even when employing a very fine integration grid (NWChem “xfine” grid). The problem is likely to arise from a specific functional form used in these meta-GGA functionals that can cause large errors in individual

contributions to the exchange energy, a topic thoroughly discussed by Wheeler and Houk.<sup>2</sup> Therefore, only single-point energy calculations on B3LYP optimized geometries were run with the M06 and M06-L density functionals.

1. M. Valiev, E. J. Bylaska, N. Govind, K. Kowalski, T.P. Straatsma, H.J.J. van Dam, D. Wang, J. Nieplocha, E. Apra, T.L. Windus, W.A. de Jong, *Comput. Phys. Commun.* 2010, **181**, 1477-1489.
2. S. E. Wheeler, K. N. Houk, *J. Chem. Theory Comput.* 2010, **6**, 395-404.

Table S1. Gas-phase interaction energies ( $\Delta E_1$ ) for global minima of  $\text{La}^{3+}$  with ligand **1b** and **6–9** (kcal/mol)

| ligand    | $\Delta E_1$ |
|-----------|--------------|
| <b>1b</b> | -301.2       |
| <b>6</b>  | -300.5       |
| <b>7</b>  | -283.2       |
| <b>8</b>  | -281.6       |
| <b>9</b>  | -337.1       |

Obtained as  $E(1:1 \text{ La}^{3+}\text{-ligand complex}) - E(\text{ligand}) - E(\text{La}^{3+})$ .

Table S2. Calculated distances ( $\text{\AA}$ ) from the central metal ion to neighboring ligand donor atoms in neutral Am(III) and Eu(III) complexes

| complex                                         | M–N/S |       | M–O   |       | M–ONO <sub>2</sub> |       |
|-------------------------------------------------|-------|-------|-------|-------|--------------------|-------|
|                                                 | Am    | Eu    | Am    | Eu    | Am                 | Eu    |
| $\text{M}(\text{H}_2\text{O})_4(\text{NO}_3)_3$ |       |       | 2.572 | 2.512 | 2.498              | 2.466 |
| $\text{M}(\mathbf{1b})_2(\text{NO}_3)_3$        | 2.721 | 2.730 | 2.531 | 2.494 | 2.554              | 2.514 |
| $\text{M}(\mathbf{2})_3$                        | 2.851 | 2.870 |       |       |                    |       |
| $\text{M}(\mathbf{6})_2(\text{NO}_3)_3$         | 2.696 | 2.704 | 2.557 | 2.526 | 2.556              | 2.512 |
| $\text{M}(\mathbf{7})_2(\text{NO}_3)_3$         | 2.722 | 2.732 | 2.547 | 2.511 | 2.542              | 2.506 |
| $\text{M}(\mathbf{8})_2(\text{NO}_3)_3$         | 2.725 | 2.733 | 2.541 | 2.507 | 2.546              | 2.505 |
| $\text{M}(\mathbf{9})_2(\text{NO}_3)_3$         | 2.676 | 2.672 | 2.508 | 2.474 | 2.576              | 2.534 |
| $\text{M}(\mathbf{10})(\text{NO}_3)_3$          | 2.722 | 2.681 | 2.552 | 2.533 | 2.548              | 2.521 |

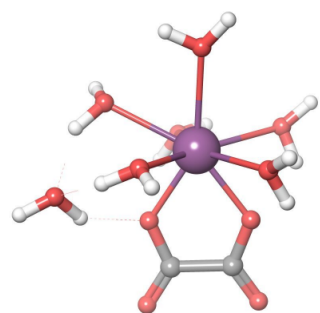

[Am(oxalate)(H<sub>2</sub>O)<sub>7</sub>]<sup>+</sup>

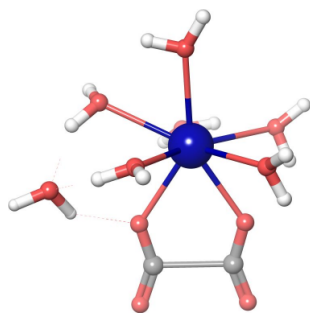

[Eu(oxalate)(H<sub>2</sub>O)<sub>7</sub>]<sup>+</sup>

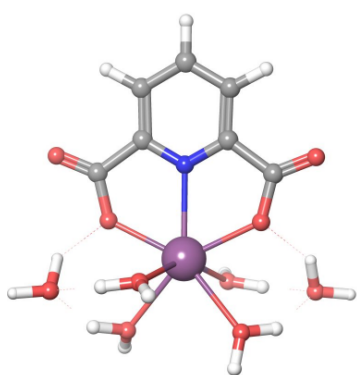

[Am(dipicolinate)(H<sub>2</sub>O)<sub>6</sub>]<sup>+</sup>

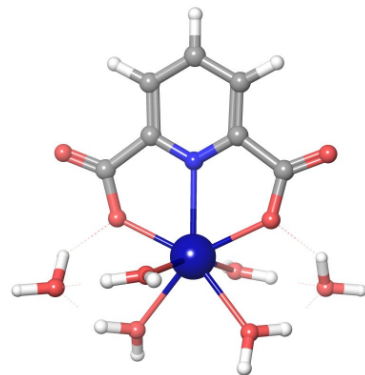

[Eu(dipicolinate)(H<sub>2</sub>O)<sub>6</sub>]<sup>+</sup>

**Figure S1.** Initial set of optimized structures for aqueous 1:1 metal ion-ligand complexes

[Am(H<sub>2</sub>O)<sub>8</sub>]<sup>3+</sup> B3LYP/6-311++G\*\* Total energy: -1206.41802931

|    |             |             |             |
|----|-------------|-------------|-------------|
| Am | -0.00000208 | 0.00000121  | 0.00553715  |
| O  | 1.65052694  | 1.31809537  | -1.38563387 |
| H  | 1.43260086  | 1.89866999  | -2.13223772 |
| H  | 2.61524200  | 1.37004780  | -1.29088640 |
| O  | 0.40669460  | 2.06926792  | 1.37541664  |
| H  | 1.09059871  | 2.74603133  | 1.24773320  |
| H  | -0.11054667 | 2.36317469  | 2.14239916  |
| O  | 2.06989765  | -0.40722191 | 1.37438167  |
| H  | 2.36372793  | 0.10907190  | 2.14203305  |
| H  | 2.74684270  | -1.09076055 | 1.24570507  |
| O  | -1.31756435 | 1.65060845  | -1.38598846 |
| H  | -1.89826476 | 1.43266851  | -2.13249027 |
| H  | -1.36902386 | 2.61538863  | -1.29162592 |
| O  | 1.31774608  | -1.64990476 | -1.38664666 |
| H  | 1.36912796  | -2.61474389 | -1.29284716 |
| H  | 1.89858847  | -1.43156072 | -2.13291997 |
| O  | -2.07002775 | 0.40652702  | 1.37440356  |
| H  | -2.74697546 | 1.09012192  | 1.24603998  |
| H  | -2.36394561 | -0.11022965 | 2.14170975  |
| O  | -0.40689094 | -2.06995734 | 1.37432437  |
| H  | -1.09074466 | -2.74668064 | 1.24615924  |
| H  | 0.11026995  | -2.36428975 | 2.14119789  |
| O  | -1.65036626 | -1.31741124 | -1.38647727 |
| H  | -2.61510020 | -1.36934172 | -1.29190926 |
| H  | -1.43236670 | -1.89761907 | -2.13334474 |

[Eu(H<sub>2</sub>O)<sub>8</sub>]<sup>3+</sup> B3LYP/6-311++G\*\* Total energy: -1321.35382096

|    |             |             |             |
|----|-------------|-------------|-------------|
| Eu | 0.00010192  | 0.00007144  | 0.00512192  |
| O  | 1.66202087  | 1.25181203  | -1.34555952 |
| H  | 1.46198428  | 1.83234314  | -2.09714707 |
| H  | 2.62516217  | 1.29381733  | -1.23293195 |
| O  | 0.34605349  | 2.05055518  | 1.33444605  |
| H  | 1.01726368  | 2.74009592  | 1.20785931  |
| H  | -0.18369377 | 2.33644171  | 2.09589050  |
| O  | 2.05086067  | -0.34626577 | 1.33403941  |
| H  | 2.33681453  | 0.18342476  | 2.09550407  |
| H  | 2.74040428  | -1.01747059 | 1.20735457  |
| O  | -1.25144700 | 1.66229684  | -1.34561193 |
| H  | -1.83167334 | 1.46199760  | -2.09737288 |
| H  | -1.29404832 | 2.62540249  | -1.23285463 |
| O  | 1.25110805  | -1.66154925 | -1.34671488 |
| H  | 1.29343635  | -2.62464348 | -1.23379716 |
| H  | 1.83170347  | -1.46154322 | -2.09825974 |
| O  | -2.05082910 | 0.34561918  | 1.33359935  |
| H  | -2.74048181 | 1.01665603  | 1.20664122  |
| H  | -2.33692948 | -0.18415671 | 2.09495474  |

|   |             |             |             |
|---|-------------|-------------|-------------|
| O | -0.34588960 | -2.05124619 | 1.33325222  |
| H | -1.01702938 | -2.74079785 | 1.20625206  |
| H | 0.18386041  | -2.33751719 | 2.09456270  |
| O | -1.66186560 | -1.25072413 | -1.34677756 |
| H | -2.62493112 | -1.29363821 | -1.23378937 |
| H | -1.46156937 | -1.83099011 | -2.09850588 |

[Am(H<sub>2</sub>O)<sub>9</sub>]<sup>3+</sup> B3LYP/6-311++G\*\* Total energy: -1282.91069370

|    |             |             |             |
|----|-------------|-------------|-------------|
| Am | 0.00292451  | 0.00679026  | 0.00272253  |
| O  | 0.01737708  | -0.09727988 | 2.53841693  |
| H  | 0.78147213  | -0.12326009 | 3.13410157  |
| H  | -0.76726664 | -0.16012010 | 3.10395712  |
| O  | 2.44495187  | -0.26435372 | 0.76257111  |
| H  | 3.07528820  | 0.45693053  | 0.91098119  |
| H  | 2.91997412  | -1.07809257 | 0.98991764  |
| O  | 0.22805591  | -2.46111018 | 0.59137802  |
| H  | 0.45136819  | -3.16896789 | -0.03173623 |
| H  | 0.17147233  | -2.88434640 | 1.46132738  |
| O  | -2.25893062 | -0.84397999 | 0.95808831  |
| H  | -3.06215159 | -0.31683543 | 1.08377838  |
| H  | -2.49272794 | -1.74490393 | 1.22774184  |
| O  | 0.92011968  | 2.24359410  | 0.90336612  |
| H  | 0.96268134  | 2.52912323  | 1.82872475  |
| H  | 1.29369181  | 2.97382083  | 0.38680605  |
| O  | 0.55466370  | 1.50114378  | -1.97299138 |
| H  | 1.24288422  | 1.33070799  | -2.63386432 |
| H  | 0.11419488  | 2.31959872  | -2.24770988 |
| O  | -1.53841451 | -0.73920328 | -1.88235963 |
| H  | -1.54105103 | -0.45837916 | -2.80986626 |
| H  | -2.29563415 | -1.33628069 | -1.78583731 |
| O  | -1.80218081 | 1.83453453  | -0.12694012 |
| H  | -1.79231595 | 2.67517185  | 0.35558989  |
| H  | -2.60269966 | 1.85563426  | -0.67303491 |
| O  | 1.40878752  | -1.23343410 | -1.79571196 |
| H  | 2.36539061  | -1.38548557 | -1.77038323 |
| H  | 1.09649674  | -1.66670711 | -2.60428845 |

[Eu(H<sub>2</sub>O)<sub>9</sub>]<sup>3+</sup> B3LYP/6-311++G\*\* Total energy: -1397.84647692

|    |             |             |            |
|----|-------------|-------------|------------|
| Eu | 0.00388102  | 0.00510651  | 0.00117219 |
| O  | -0.01102388 | -0.02312879 | 2.50140224 |
| H  | 0.75234259  | -0.04036345 | 3.09816702 |
| H  | -0.79545018 | -0.09588820 | 3.06572079 |
| O  | 2.39472466  | -0.26528993 | 0.72737190 |
| H  | 3.03965054  | 0.44599052  | 0.85946296 |
| H  | 2.85148631  | -1.08658520 | 0.96392486 |
| O  | 0.26931360  | -2.39661271 | 0.65258568 |
| H  | 0.50420888  | -3.12200604 | 0.05439526 |

|   |             |             |             |
|---|-------------|-------------|-------------|
| H | 0.20805670  | -2.78752138 | 1.53716002  |
| O | -2.21460503 | -0.90855724 | 0.89194381  |
| H | -3.02993321 | -0.41129695 | 1.05497851  |
| H | -2.41202286 | -1.82468601 | 1.13759946  |
| O | 0.91290023  | 2.20319187  | 0.88016675  |
| H | 0.94178010  | 2.49789560  | 1.80279013  |
| H | 1.30023870  | 2.92244080  | 0.35904695  |
| O | 0.59028050  | 1.50697864  | -1.91652004 |
| H | 1.27466049  | 1.34584019  | -2.58348916 |
| H | 0.14421013  | 2.32542864  | -2.18161059 |
| O | -1.51371168 | -0.64968370 | -1.87796375 |
| H | -1.50029371 | -0.33809854 | -2.79542695 |
| H | -2.28710225 | -1.22859310 | -1.80239126 |
| O | -1.76986149 | 1.78044688  | -0.09332512 |
| H | -1.77017770 | 2.61319028  | 0.40250627  |
| H | -2.57344415 | 1.79270028  | -0.63479724 |
| O | 1.32512485  | -1.26859329 | -1.76922500 |
| H | 2.28217047  | -1.41861481 | -1.78572646 |
| H | 0.97605421  | -1.70131865 | -2.56271198 |

[Am(H<sub>2</sub>O)<sub>20</sub>]<sup>3+</sup> B3LYP/6-311++G\*\* Total energy: -2124.35328505

|    |             |             |             |
|----|-------------|-------------|-------------|
| Am | 0.17324049  | 0.10600762  | -0.22191472 |
| O  | 0.15414759  | -2.86292038 | 3.32813710  |
| H  | 0.54839760  | -3.17764718 | 4.15251068  |
| H  | 0.35178904  | -3.53763217 | 2.64717538  |
| O  | 0.57109512  | -0.30292609 | 2.20544344  |
| H  | 0.57764542  | -1.17297561 | 2.65389807  |
| H  | 0.58875431  | 0.39172942  | 2.89551843  |
| O  | -0.50534379 | -0.89893791 | -2.42323078 |
| H  | -1.01893666 | -1.70087118 | -2.63361113 |
| H  | -0.04007914 | -0.63582905 | -3.24538178 |
| O  | 1.68318566  | 1.92800873  | 0.53258960  |
| H  | 1.44115593  | 2.65995309  | 1.14547313  |
| H  | 2.59077311  | 2.08445361  | 0.21140268  |
| O  | -2.44220007 | -1.88551038 | 3.03132093  |
| H  | -3.20105579 | -2.41861476 | 3.30291223  |
| H  | -1.63819979 | -2.35343630 | 3.34109354  |
| O  | -1.50682002 | -1.63798604 | 0.37024326  |
| H  | -1.97621122 | -1.62351177 | 1.23069556  |
| H  | -1.63958575 | -2.54299850 | 0.01647869  |
| O  | 4.20236064  | 1.90120651  | -0.76768962 |
| H  | 4.54267981  | 2.66073873  | -1.26071954 |
| H  | 4.97394138  | 1.52370776  | -0.32231300 |
| O  | -1.36890269 | 3.97705338  | 0.24481951  |
| H  | -0.72150853 | 4.21180841  | 0.93895397  |
| H  | -1.96674208 | 4.72753851  | 0.13572610  |
| O  | 0.68894155  | -4.37991914 | 0.98108554  |



|   |             |             |             |
|---|-------------|-------------|-------------|
| H | 1.22353492  | -5.18440469 | 1.02364293  |
| H | -0.09666872 | -4.58835147 | 0.43563202  |
| O | -1.84116277 | -3.38548790 | -3.22214152 |
| H | -2.75237930 | -3.30007211 | -3.53769367 |
| H | -1.38480926 | -3.88427778 | -3.91471779 |
| O | -2.48446925 | 0.85539119  | 3.55018356  |
| H | -3.29903278 | 1.22097105  | 3.91996412  |
| H | -2.57643137 | -0.12105182 | 3.56254275  |
| O | -0.55956836 | 2.06537997  | -1.60022322 |
| H | -0.79458842 | 2.90352617  | -1.15135334 |
| H | -0.60587615 | 2.21860878  | -2.56232447 |
| O | 1.09490583  | 0.23501572  | -4.35693260 |
| H | 1.49850509  | -0.13756852 | -5.15179864 |
| H | 0.66138391  | 1.07254501  | -4.61862696 |
| O | -1.56962797 | 1.35766467  | 0.99221970  |
| H | -1.97205739 | 1.19180557  | 1.87406895  |
| H | -1.79682738 | 2.27569877  | 0.73680628  |
| O | -0.46134900 | 2.57531658  | -4.45756127 |
| H | -0.05853922 | 3.41887981  | -4.70809870 |
| H | -1.28137423 | 2.52950785  | -4.96971503 |
| O | 0.65807994  | 3.83005400  | 2.22306491  |
| H | 1.13209144  | 4.59936796  | 2.56577500  |
| H | 0.41940135  | 3.27717672  | 2.99790624  |
| O | 1.51206693  | -2.00059219 | -0.12055137 |
| H | 2.29683139  | -2.06587829 | -0.67779121 |
| H | 1.34422579  | -2.87946474 | 0.28900653  |
| O | 2.18616493  | 0.20144519  | -1.78135098 |
| H | 2.02922853  | 0.23249530  | -2.74723001 |
| H | 2.97891012  | 0.74249933  | -1.59391115 |
| O | 0.09315538  | 1.77566978  | 4.05863063  |
| H | 0.45489241  | 1.83648247  | 4.95276713  |
| H | -0.85450816 | 1.54498346  | 4.14948432  |
| O | -1.69183904 | -4.27596276 | -0.53835150 |
| H | -2.40859236 | -4.87234961 | -0.28325993 |
| H | -1.73868927 | -4.19720896 | -1.51232170 |

[Eu(H<sub>2</sub>O)<sub>20</sub>]<sup>3+</sup> B3LYP/6-311++G\*\* Total energy: -2239.29054901

|    |             |             |             |
|----|-------------|-------------|-------------|
| Eu | 0.19448273  | 0.11769604  | -0.24867350 |
| O  | 0.18113587  | -2.85363245 | 3.28166520  |
| H  | 0.57510915  | -3.16342400 | 4.10803319  |
| H  | 0.39590414  | -3.52250789 | 2.60018957  |
| O  | 0.56866261  | -0.30611173 | 2.13546334  |
| H  | 0.58654140  | -1.17447830 | 2.58645716  |
| H  | 0.60747458  | 0.38963514  | 2.82259176  |
| O  | -0.49006088 | -0.87792923 | -2.39876540 |
| H  | -1.02643029 | -1.66502914 | -2.60644601 |
| H  | -0.02495977 | -0.62894204 | -3.22557673 |

|   |             |             |             |
|---|-------------|-------------|-------------|
| O | 1.66904834  | 1.90327810  | 0.53431898  |
| H | 1.42680693  | 2.64039685  | 1.14097366  |
| H | 2.57821165  | 2.06136502  | 0.21895374  |
| O | -2.41371645 | -1.87011198 | 2.98158172  |
| H | -3.17332553 | -2.40554850 | 3.24618560  |
| H | -1.61056539 | -2.33820373 | 3.29302176  |
| O | -1.46062932 | -1.58483725 | 0.33629667  |
| H | -1.92929676 | -1.57158878 | 1.19698492  |
| H | -1.59341418 | -2.49092486 | -0.01478931 |
| O | 4.18907350  | 1.92782462  | -0.76471013 |
| H | 4.52064368  | 2.70564175  | -1.23461503 |
| H | 4.96592284  | 1.54125116  | -0.33668135 |
| O | -1.31115963 | 3.98492667  | 0.18919408  |
| H | -0.67860618 | 4.22389155  | 0.89550056  |
| H | -1.90901961 | 4.73298285  | 0.06482593  |
| O | 0.74287910  | -4.33451219 | 0.92115320  |
| H | 1.28681162  | -5.13325741 | 0.95245084  |
| H | -0.04546689 | -4.54697968 | 0.38143055  |
| O | -1.84980793 | -3.33916027 | -3.23661405 |
| H | -2.76313244 | -3.25806799 | -3.54714666 |
| H | -1.39271899 | -3.82861712 | -3.93528980 |
| O | -2.45890011 | 0.87208513  | 3.47467773  |
| H | -3.27540158 | 1.24632025  | 3.83126731  |
| H | -2.55819804 | -0.10351591 | 3.49290888  |
| O | -0.49314537 | 2.04226438  | -1.62779420 |
| H | -0.71923948 | 2.88526993  | -1.18390555 |
| H | -0.55342102 | 2.19144458  | -2.58950572 |
| O | 1.10152363  | 0.20928598  | -4.36621514 |
| H | 1.51078292  | -0.18066665 | -5.14974241 |
| H | 0.66673067  | 1.03961993  | -4.64846903 |
| O | -1.49485171 | 1.37418571  | 0.93497936  |
| H | -1.90822608 | 1.20394153  | 1.81100680  |
| H | -1.72761959 | 2.28993776  | 0.67591329  |
| O | -0.44024083 | 2.54577814  | -4.49148907 |
| H | -0.03394446 | 3.38393188  | -4.75439490 |
| H | -1.26838645 | 2.50335476  | -4.99064938 |
| O | 0.67432227  | 3.83692875  | 2.20205519  |
| H | 1.15786999  | 4.60104751  | 2.54299212  |
| H | 0.43592203  | 3.28432149  | 2.97724743  |
| O | 1.52619994  | -1.93815379 | -0.17370826 |
| H | 2.30922252  | -1.98167552 | -0.73525414 |
| H | 1.37584268  | -2.82370065 | 0.22794422  |
| O | 2.16712382  | 0.24955840  | -1.79113460 |
| H | 2.01917908  | 0.26406039  | -2.75881698 |
| H | 2.95734893  | 0.79424352  | -1.60446216 |
| O | 0.11854476  | 1.76914723  | 4.01475272  |
| H | 0.47803936  | 1.81825137  | 4.91047939  |

|   |             |             |             |
|---|-------------|-------------|-------------|
| H | -0.83076835 | 1.54447185  | 4.10098703  |
| O | -1.65892576 | -4.22700105 | -0.56106378 |
| H | -2.36980880 | -4.82254604 | -0.28817088 |
| H | -1.72654417 | -4.15390352 | -1.53434785 |

Am(H<sub>2</sub>O)<sub>3</sub>(NO<sub>3</sub>)<sub>3</sub> B3LYP/6-311++G\*\* Total energy: -1666.320018

|    |             |             |             |
|----|-------------|-------------|-------------|
| Am | -0.09351025 | 0.07696738  | -0.05729135 |
| O  | -0.39448704 | -2.12313272 | -1.34104138 |
| O  | -2.31732989 | 0.71167141  | -1.21697205 |
| O  | 1.47858248  | -0.17565743 | -1.98377618 |
| O  | 0.21499632  | 1.58184570  | -2.03917474 |
| O  | 1.59900013  | 1.18905351  | -3.68597243 |
| O  | -1.95539213 | -1.40245034 | 0.82851371  |
| O  | -3.00315958 | -1.03929522 | 2.71133775  |
| O  | 1.40376639  | -1.57149886 | 1.05323453  |
| O  | 3.27276511  | -1.03312777 | 2.05059124  |
| N  | 1.12512716  | 0.88074529  | -2.62542340 |
| N  | -2.16943611 | -0.73240364 | 1.90208164  |
| N  | 2.28254912  | -0.71978348 | 1.44878596  |
| O  | -0.12053562 | 2.44525890  | 0.92114771  |
| O  | -1.41704374 | 0.30706757  | 2.03873840  |
| O  | 2.01027560  | 0.50587207  | 1.14663919  |
| H  | 0.43348659  | -2.38648009 | -1.76487538 |
| H  | -0.65222254 | -2.85246226 | -0.76130929 |
| H  | -3.03373640 | 0.08503748  | -1.37119333 |
| H  | -2.17697727 | 1.20471063  | -2.03625047 |
| H  | 0.75689483  | 2.79493378  | 1.12554684  |
| H  | -0.58479966 | 2.39978327  | 1.76930807  |

Eu(H<sub>2</sub>O)<sub>3</sub>(NO<sub>3</sub>)<sub>3</sub> B3LYP/6-311++G\*\* Total energy: -1781.260776

|    |             |             |             |
|----|-------------|-------------|-------------|
| Eu | -0.06129844 | 0.00643927  | -0.11331638 |
| O  | -0.41109354 | -2.16170708 | -1.32538857 |
| O  | -2.11877169 | 0.64895419  | -1.41438583 |
| O  | 1.33024076  | -0.23101970 | -2.13229145 |
| O  | 0.52644511  | 1.74752658  | -1.80766076 |
| O  | 1.83981663  | 1.37986721  | -3.51572135 |
| O  | -2.01569098 | -1.31067916 | 0.71633668  |
| O  | -2.86915768 | -1.08040399 | 2.71537706  |
| O  | 1.38141068  | -1.57688478 | 1.04517910  |
| O  | 3.27268003  | -1.03511975 | 1.99621675  |
| N  | 1.26398873  | 0.98714365  | -2.53587503 |
| N  | -2.07036413 | -0.75896252 | 1.87604535  |
| N  | 2.29095261  | -0.72857727 | 1.37610274  |
| O  | -0.29655311 | 2.36015704  | 0.72361401  |
| O  | -1.20265024 | 0.17060240  | 2.06223351  |
| O  | 2.05966938  | 0.47606588  | 0.98628786  |
| H  | 0.30323567  | -2.45283844 | -1.90522569 |

|   |             |             |             |
|---|-------------|-------------|-------------|
| H | -0.71896881 | -2.92200747 | -0.81765599 |
| H | -2.96559834 | 0.19043616  | -1.38756423 |
| H | -2.17908337 | 1.38693717  | -2.03077365 |
| H | 0.34385374  | 3.01687481  | 0.42503982  |
| H | -0.42504517 | 2.47110256  | 1.67355465  |

Am(**1b**)<sub>2</sub>(NO<sub>3</sub>)<sub>3</sub> B3LYP/6-311++G\*\* Total energy: -2504.692918

|    |             |             |             |
|----|-------------|-------------|-------------|
| Am | -0.03579777 | -0.01574830 | 0.18487665  |
| O  | 1.72642636  | -0.15349105 | 1.99260280  |
| O  | 0.14087478  | 1.24836227  | 2.44120518  |
| O  | 1.84279572  | 1.07220032  | 3.79570951  |
| N  | 1.25350265  | 0.73767746  | 2.78775613  |
| O  | 1.57699135  | -0.45553467 | -1.75804039 |
| O  | -0.14746400 | 0.76828295  | -2.21975624 |
| O  | 1.31833506  | 0.33248233  | -3.77743138 |
| N  | 0.93335160  | 0.21843324  | -2.63059813 |
| O  | -1.23289861 | -1.60473678 | 1.87065975  |
| O  | -2.43469048 | -0.09641697 | 0.89500028  |
| O  | -3.38576753 | -1.54499021 | 2.22385560  |
| N  | -2.38638553 | -1.10477026 | 1.69320000  |
| C  | 1.44268920  | 5.58688796  | 0.32377052  |
| C  | 0.21343133  | 5.88727587  | -0.52798366 |
| C  | -0.81074410 | 4.79187459  | -0.38985519 |
| C  | -0.36558964 | 3.48955058  | -0.16056827 |
| C  | 1.09503273  | 3.18152038  | -0.03271698 |
| N  | 1.94346272  | 4.22812596  | 0.07946060  |
| C  | 3.36253022  | 3.97712269  | 0.32618423  |
| O  | 1.48610804  | 2.00795887  | -0.04175135 |
| N  | -1.18542181 | 2.43193520  | -0.05855030 |
| C  | -2.49927481 | 2.63854374  | -0.16632700 |
| C  | -3.03951677 | 3.90466062  | -0.39682703 |
| C  | -2.18599186 | 4.99165340  | -0.51555184 |
| H  | 2.24752840  | 6.28299649  | 0.08155154  |
| H  | 1.21162437  | 5.70739023  | 1.39044823  |
| H  | -0.20813958 | 6.85150927  | -0.23294834 |
| H  | 0.51018667  | 5.97313962  | -1.58060912 |
| H  | 3.59625123  | 4.09292718  | 1.39001457  |
| H  | 3.96005285  | 4.68549808  | -0.25134012 |
| H  | 3.60005731  | 2.96126204  | 0.02226136  |
| H  | -3.13216705 | 1.76802198  | -0.04944528 |
| H  | -4.11302992 | 4.02280873  | -0.47692519 |
| H  | -2.57813042 | 5.98684830  | -0.69776160 |
| C  | -1.35667576 | -5.42337277 | -1.39823785 |
| C  | 0.13625440  | -5.72666879 | -1.47800816 |
| C  | 0.92231395  | -4.76060635 | -0.63133494 |
| C  | 0.43370950  | -3.46344786 | -0.47487237 |
| C  | -0.85247715 | -3.03753459 | -1.11105834 |

|   |             |             |             |
|---|-------------|-------------|-------------|
| N | -1.63011983 | -4.00178548 | -1.65005304 |
| C | -2.94611083 | -3.65173184 | -2.18170926 |
| O | -1.16531651 | -1.83884488 | -1.13924454 |
| N | 1.06823871  | -2.50821062 | 0.22041131  |
| C | 2.22373780  | -2.81790091 | 0.80995437  |
| C | 2.79258839  | -4.08936341 | 0.71264133  |
| C | 2.13848433  | -5.06881493 | -0.02028631 |
| H | -1.89885823 | -6.00049930 | -2.14917877 |
| H | -1.75509369 | -5.70407170 | -0.41440502 |
| H | 0.31574889  | -6.75672074 | -1.15976722 |
| H | 0.47039235  | -5.64828082 | -2.51997972 |
| H | -3.73173021 | -3.89265122 | -1.45747341 |
| H | -3.12422067 | -4.21118597 | -3.10240478 |
| H | -2.97166126 | -2.58525085 | -2.38823990 |
| H | 2.69552965  | -2.02911902 | 1.38232116  |
| H | 3.73272933  | -4.29495670 | 1.20933081  |
| H | 2.56041348  | -6.06390988 | -0.11587670 |

Eu(**1b**)<sub>2</sub>(NO<sub>3</sub>)<sub>3</sub> B3LYP/6-311++G\*\* Total energy: -2619.630694

|    |             |             |             |
|----|-------------|-------------|-------------|
| Eu | -0.07085534 | -0.02012470 | 0.24582137  |
| O  | 1.69498599  | -0.13227326 | 2.00444303  |
| O  | 0.05068515  | 1.19112385  | 2.45030907  |
| O  | 1.74478651  | 1.07598319  | 3.82179219  |
| N  | 1.18210723  | 0.72625071  | 2.80564850  |
| O  | 1.40074852  | -0.49562687 | -1.75473822 |
| O  | -0.27681097 | 0.81539868  | -2.13316706 |
| O  | 1.08795283  | 0.30870276  | -3.75998628 |
| N  | 0.75049041  | 0.21330309  | -2.59517327 |
| O  | -1.29498887 | -1.54481732 | 1.83237626  |
| O  | -2.50556993 | -0.09561335 | 0.78912512  |
| O  | -3.46211862 | -1.56280064 | 2.09203751  |
| N  | -2.46094356 | -1.08835476 | 1.59795347  |
| C  | 1.58462110  | 5.52108419  | 0.16520793  |
| C  | 0.31925619  | 5.83982156  | -0.62399107 |
| C  | -0.73855299 | 4.79493257  | -0.38332690 |
| C  | -0.33519515 | 3.48379028  | -0.12873311 |
| C  | 1.11529578  | 3.11971507  | -0.05901513 |
| N  | 2.01200594  | 4.13110044  | -0.04286216 |
| C  | 3.43102786  | 3.82888888  | 0.13517808  |
| O  | 1.45771669  | 1.93102137  | -0.02437170 |
| N  | -1.18788512 | 2.46344008  | 0.04824190  |
| C  | -2.49552458 | 2.72080992  | -0.00078301 |
| C  | -2.99711012 | 4.00153586  | -0.24166995 |
| C  | -2.10947356 | 5.04808244  | -0.44257559 |
| H  | 2.40245427  | 6.16805752  | -0.15646703 |
| H  | 1.42511129  | 5.69840314  | 1.23715586  |
| H  | -0.04501165 | 6.83156843  | -0.34446459 |

|   |             |             |             |
|---|-------------|-------------|-------------|
| H | 0.55444847  | 5.87185579  | -1.69499407 |
| H | 3.73179395  | 3.98271554  | 1.17718952  |
| H | 4.02264593  | 4.48275360  | -0.50878065 |
| H | 3.60761088  | 2.79063729  | -0.13247476 |
| H | -3.15438377 | 1.87809442  | 0.16583215  |
| H | -4.06792416 | 4.16085811  | -0.27017279 |
| H | -2.47096471 | 6.05198868  | -0.63953577 |
| C | -1.18604142 | -5.40955486 | -1.53175730 |
| C | 0.31778170  | -5.66042573 | -1.56545551 |
| C | 1.03925010  | -4.70976244 | -0.64655011 |
| C | 0.50528122  | -3.43547955 | -0.45231730 |
| C | -0.77505314 | -3.02402070 | -1.11032051 |
| N | -1.49799952 | -3.98707075 | -1.72452178 |
| C | -2.80655711 | -3.65434446 | -2.28454862 |
| O | -1.13526984 | -1.84041177 | -1.08564716 |
| N | 1.08815520  | -2.49085867 | 0.30102633  |
| C | 2.23189657  | -2.79399585 | 0.91628920  |
| C | 2.84034771  | -4.04447451 | 0.79015015  |
| C | 2.24178289  | -5.00989953 | -0.00557899 |
| H | -1.67887842 | -5.96539973 | -2.33116384 |
| H | -1.61260775 | -5.75210498 | -0.57956995 |
| H | 0.52104700  | -6.69755969 | -1.28720160 |
| H | 0.68898354  | -5.52146778 | -2.58833864 |
| H | -3.60770849 | -3.94910614 | -1.59812046 |
| H | -2.93670501 | -4.17868196 | -3.23342478 |
| H | -2.85916027 | -2.58115258 | -2.44666007 |
| H | 2.66394502  | -2.01497293 | 1.53149798  |
| H | 3.76849968  | -4.24363563 | 1.31140396  |
| H | 2.69617820  | -5.98756219 | -0.12804382 |

Am(2)3 B3LYP/6-311+G\*\* Total energy: -7422.35804026

|    |             |             |             |
|----|-------------|-------------|-------------|
| Am | -0.00021015 | -0.00084634 | -0.17343653 |
| S  | -1.74443795 | 1.72840225  | 1.26716269  |
| S  | -0.15854115 | 2.46660895  | -1.59871790 |
| P  | -1.41950038 | 3.17928220  | -0.14372221 |
| C  | -0.65599078 | 4.63523959  | 0.73501412  |
| C  | -1.20393493 | 5.33425317  | 1.83376475  |
| C  | 0.63171001  | 4.98211520  | 0.31337899  |
| C  | -0.45660447 | 6.33216552  | 2.46216730  |
| C  | 1.36664010  | 5.97930648  | 0.94630968  |
| H  | 1.05956148  | 4.45830880  | -0.53089371 |
| C  | 0.82316340  | 6.65753101  | 2.02832318  |
| H  | -0.89127120 | 6.86441034  | 3.29834540  |
| H  | 2.36014792  | 6.22162446  | 0.58745448  |
| H  | 1.38266189  | 7.43595881  | 2.53322274  |
| C  | -3.01533789 | 3.63627914  | -0.99858834 |
| C  | -3.27472816 | 4.78228066  | -1.78353699 |

|   |             |             |             |
|---|-------------|-------------|-------------|
| C | -4.01244249 | 2.66101076  | -0.90921154 |
| C | -4.50687084 | 4.91654565  | -2.42689851 |
| C | -5.23190628 | 2.79947221  | -1.56470961 |
| H | -3.82923890 | 1.78193848  | -0.30517141 |
| C | -5.48380895 | 3.93216006  | -2.32569145 |
| H | -4.69707354 | 5.80137254  | -3.01865995 |
| H | -5.97969283 | 2.02036316  | -1.47324042 |
| H | -6.42965501 | 4.05679332  | -2.83920960 |
| S | -0.62181423 | -2.36866241 | 1.28108965  |
| S | -2.06255797 | -1.37863930 | -1.58556492 |
| P | -2.04445645 | -2.82005319 | -0.12377513 |
| C | -3.68472039 | -2.88365533 | 0.75969089  |
| C | -4.01263678 | -3.70267186 | 1.86323872  |
| C | -4.63079190 | -1.94466748 | 0.33596916  |
| C | -5.24899732 | -3.55230787 | 2.49415249  |
| C | -5.86032155 | -1.80470175 | 0.97140783  |
| H | -4.39379754 | -1.31618472 | -0.51201189 |
| C | -6.17250337 | -2.60947742 | 2.05814606  |
| H | -5.48994048 | -4.19100263 | 3.33404966  |
| H | -6.56846184 | -1.06779517 | 0.61076893  |
| H | -7.12515189 | -2.51244121 | 2.56505505  |
| C | -1.64372815 | -4.43443713 | -0.97207632 |
| C | -2.50810336 | -5.23637504 | -1.75087698 |
| C | -0.30010298 | -4.80908127 | -0.88452541 |
| C | -2.00929012 | -6.37328973 | -2.39019379 |
| C | 0.18868914  | -5.93719090 | -1.53597741 |
| H | 0.37082401  | -4.20762732 | -0.28510512 |
| C | -0.66782547 | -6.72582412 | -2.29093285 |
| H | -2.68166538 | -6.98365317 | -2.97725975 |
| H | 1.23771514  | -6.19414626 | -1.44608298 |
| H | -0.30365169 | -7.60945067 | -2.80126763 |
| S | 2.36606965  | 0.65383845  | 1.26916609  |
| S | 2.21936758  | -1.10650517 | -1.58618071 |
| P | 3.46359491  | -0.36099474 | -0.13321732 |
| C | 4.34189169  | -1.74412427 | 0.75585850  |
| C | 5.21884185  | -1.61161540 | 1.85561675  |
| C | 4.00033820  | -3.03559410 | 0.34144352  |
| C | 5.70890154  | -2.75348161 | 2.49218197  |
| C | 4.49597341  | -4.16633053 | 0.98245845  |
| H | 3.33472475  | -3.14995418 | -0.50359984 |
| C | 5.35263040  | -4.02740747 | 2.06548748  |
| H | 6.38531876  | -2.63747660 | 3.32908969  |
| H | 4.21061962  | -5.15031998 | 0.62905952  |
| H | 5.74658738  | -4.89771414 | 2.57664208  |
| C | 4.65832830  | 0.78795882  | -0.99282263 |
| C | 5.78236449  | 0.43537813  | -1.77315894 |
| C | 4.31117999  | 2.13941730  | -0.91278774 |

|   |             |             |             |
|---|-------------|-------------|-------------|
| C | 6.51541900  | 1.43167545  | -2.42134007 |
| C | 5.04154731  | 3.12257343  | -1.57302625 |
| H | 3.45682360  | 2.42355931  | -0.31234631 |
| C | 6.15027808  | 2.77029249  | -2.32943428 |
| H | 7.37823133  | 1.15079616  | -3.00950567 |
| H | 4.73981107  | 4.16008427  | -1.48882872 |
| H | 6.73171772  | 3.52420741  | -2.84654129 |
| C | -3.11080516 | -4.74802190 | 2.48539388  |
| C | -3.99117331 | -4.98154646 | -1.90380049 |
| C | -2.56205292 | 5.07978134  | 2.45334248  |
| C | -2.31125386 | 5.93782994  | -1.93923737 |
| C | 6.30249698  | -0.97744729 | -1.91871811 |
| C | 5.67528836  | -0.30400440 | 2.46792653  |
| F | -2.46638113 | -4.27091275 | 3.57345915  |
| F | -3.82455066 | -5.82099259 | 2.90690284  |
| F | -2.17402480 | -5.22456560 | 1.64184439  |
| F | -4.68435894 | -5.35974155 | -0.79928858 |
| F | -4.28024366 | -3.68194503 | -2.12348620 |
| F | -4.52265718 | -5.67166704 | -2.93664316 |
| F | 5.32064269  | -1.87880522 | -2.12923579 |
| F | 6.98023871  | -1.38161899 | -0.81382111 |
| F | 7.16239793  | -1.09951488 | -2.95369227 |
| F | 6.96281820  | -0.38295404 | 2.88553857  |
| F | 5.61668290  | 0.74017162  | 1.61792189  |
| F | 4.94360770  | 0.02240876  | 3.55645244  |
| F | -3.13477590 | 6.23676011  | 2.86776122  |
| F | -2.47464633 | 4.28826328  | 3.54543100  |
| F | -3.44120490 | 4.50337118  | 1.61008858  |
| F | -1.04088431 | 5.53643647  | -2.15334285 |
| F | -2.29479435 | 6.73248435  | -0.83844713 |
| F | -2.63963014 | 6.73845405  | -2.97686579 |

Eu(2)3 B3LYP/6-311+G\*\* Total energy: -7537.29381624

|    |             |            |             |
|----|-------------|------------|-------------|
| Eu | -0.01505551 | 0.00462594 | -0.18209022 |
| S  | -1.80684834 | 1.74677310 | 1.22085753  |
| S  | -0.15353430 | 2.50205897 | -1.59545590 |
| P  | -1.43531272 | 3.21108294 | -0.16034643 |
| C  | -0.67706716 | 4.64407417 | 0.75707141  |
| C  | -1.24376524 | 5.33563663 | 1.85091297  |
| C  | 0.62800660  | 4.97415725 | 0.37808165  |
| C  | -0.49797557 | 6.31089526 | 2.51536498  |
| C  | 1.36157632  | 5.94850644 | 1.04678520  |
| H  | 1.07120779  | 4.45483466 | -0.46091905 |
| C  | 0.79912821  | 6.61992624 | 2.12314509  |
| H  | -0.94717231 | 6.83776081 | 3.34716397  |
| H  | 2.36961681  | 6.17690943 | 0.72111629  |
| H  | 1.35744313  | 7.38038603 | 2.65585069  |



|   |             |             |             |
|---|-------------|-------------|-------------|
| C | -3.00353392 | 3.69348392  | -1.04750017 |
| C | -3.24080287 | 4.85556823  | -1.81541968 |
| C | -4.00065709 | 2.71486534  | -1.01072290 |
| C | -4.45534950 | 5.00487445  | -2.48818527 |
| C | -5.20216097 | 2.86857655  | -1.69465676 |
| H | -3.83286008 | 1.82136002  | -0.42354670 |
| C | -5.43456265 | 4.01905858  | -2.43473227 |
| H | -4.62923284 | 5.90230412  | -3.06559115 |
| H | -5.95067317 | 2.08661405  | -1.64270093 |
| H | -6.36665614 | 4.15583376  | -2.96973171 |
| S | -0.60623306 | -2.40933268 | 1.24646656  |
| S | -2.11694386 | -1.38237080 | -1.56488779 |
| P | -2.05630138 | -2.84667786 | -0.13101459 |
| C | -3.67205173 | -2.93962823 | 0.79076288  |
| C | -3.96749272 | -3.78432715 | 1.88380320  |
| C | -4.63164622 | -1.99438517 | 0.41447073  |
| C | -5.18733620 | -3.65394290 | 2.55012246  |
| C | -5.84426046 | -1.87385675 | 1.08506718  |
| H | -4.41898042 | -1.34497371 | -0.42404710 |
| C | -6.12508062 | -2.70496304 | 2.16035423  |
| H | -5.40348697 | -4.31244845 | 3.38131910  |
| H | -6.56304450 | -1.13030600 | 0.76123511  |
| H | -7.06429102 | -2.62328062 | 2.69421482  |
| C | -1.66376594 | -4.43781107 | -1.02201956 |
| C | -2.53996873 | -5.23797991 | -1.78914300 |
| C | -0.31067839 | -4.78633752 | -0.99277819 |
| C | -2.04363267 | -6.35265356 | -2.46835627 |
| C | 0.17512371  | -5.89185305 | -1.68338401 |
| H | 0.37048747  | -4.18307364 | -0.40682654 |
| C | -0.69344392 | -6.68213559 | -2.42253485 |
| H | -2.72484668 | -6.96280323 | -3.04508806 |
| H | 1.23163615  | -6.12881274 | -1.63787163 |
| H | -0.33160732 | -7.54865323 | -2.96286457 |
| S | 2.38465031  | 0.70729167  | 1.22253119  |
| S | 2.22441857  | -1.14324793 | -1.56899451 |
| P | 3.47327636  | -0.35874757 | -0.14399471 |
| C | 4.34503924  | -1.71308010 | 0.79171421  |
| C | 5.22513971  | -1.54631155 | 1.88401811  |
| C | 3.98932463  | -3.01622848 | 0.42968027  |
| C | 5.70652514  | -2.66700762 | 2.56319881  |
| C | 4.47559668  | -4.12579593 | 1.11306743  |
| H | 3.31969653  | -3.15692762 | -0.40806952 |
| C | 5.33679731  | -3.95304353 | 2.18744176  |
| H | 6.38588808  | -2.52478819 | 3.39355694  |
| H | 4.17790877  | -5.11971684 | 0.80019616  |
| H | 5.72351624  | -4.80651780 | 2.73133485  |
| C | 4.66929932  | 0.75205058  | -1.04702959 |

|   |             |             |             |
|---|-------------|-------------|-------------|
| C | 5.79624588  | 0.37080799  | -1.80934930 |
| C | 4.31326949  | 2.10341401  | -1.03048477 |
| C | 6.52769788  | 1.34170018  | -2.49673133 |
| C | 5.04186851  | 3.06054641  | -1.72914767 |
| H | 3.45403486  | 2.40888133  | -0.44767385 |
| C | 6.15642308  | 2.68135104  | -2.46352887 |
| H | 7.39341528  | 1.03960266  | -3.06965454 |
| H | 4.73329502  | 4.09878728  | -1.69319182 |
| H | 6.73691763  | 3.41509459  | -3.00976987 |
| C | -3.04456546 | -4.83876994 | 2.45722926  |
| C | -4.03050753 | -5.00131813 | -1.89097498 |
| C | -2.62358072 | 5.09603379  | 2.42631800  |
| C | -2.26975808 | 6.00989559  | -1.92504115 |
| C | 6.31710606  | -1.04657226 | -1.89767223 |
| C | 5.69503838  | -0.21992193 | 2.44293015  |
| F | -2.37769357 | -4.38469193 | 3.54218415  |
| F | -3.74057251 | -5.92790841 | 2.86741780  |
| F | -2.12463478 | -5.28568242 | 1.57934018  |
| F | -4.68424263 | -5.40226402 | -0.77078354 |
| F | -4.34181954 | -3.70214200 | -2.08411975 |
| F | -4.58684534 | -5.68365829 | -2.91603219 |
| F | 5.33503547  | -1.95415269 | -2.08189260 |
| F | 6.98635784  | -1.41070651 | -0.77410991 |
| F | 7.18397886  | -1.20897293 | -2.92140506 |
| F | 6.98566309  | -0.29125630 | 2.85307387  |
| F | 5.63562170  | 0.79169670  | 1.55432383  |
| F | 4.97407953  | 0.15203243  | 3.52450601  |
| F | -3.19186256 | 6.25723505  | 2.83569180  |
| F | -2.58183875 | 4.29178375  | 3.51212428  |
| F | -3.48487132 | 4.54179069  | 1.55021960  |
| F | -0.99690549 | 5.60596012  | -2.12209772 |
| F | -2.27153608 | 6.78085500  | -0.80767786 |
| F | -2.57174956 | 6.83476173  | -2.95179912 |

[Am(oxalate)(H<sub>2</sub>O)<sub>7</sub>]<sup>+</sup> B3LYP/6-311++G\*\* Total energy: -1508.032637

|    |             |             |             |
|----|-------------|-------------|-------------|
| Am | -0.23350165 | -0.44709886 | -0.02503392 |
| O  | -0.01087183 | -0.11118994 | -2.57283482 |
| O  | 3.45468774  | -0.18311619 | 0.43660971  |
| O  | 1.31698446  | -0.96516754 | 1.90255478  |
| O  | -2.58236994 | -0.19101187 | -1.16099557 |
| O  | -0.82173657 | -3.01231317 | -0.05539358 |
| O  | -1.67983850 | -0.32318620 | 2.10206875  |
| O  | 1.76451843  | -1.88113799 | -0.88345426 |
| H  | -0.81266099 | -0.01877446 | -3.10375399 |
| H  | 0.59167157  | 0.59204749  | -2.85002493 |
| H  | 4.38428629  | 0.05467359  | 0.52756185  |
| H  | 2.95371740  | 0.61186820  | 0.13612969  |

|   |             |             |             |
|---|-------------|-------------|-------------|
| H | 1.14594713  | -0.78493910 | 2.83353402  |
| H | 2.24995153  | -0.72473347 | 1.71307573  |
| H | -3.43252517 | -0.62458973 | -1.29519437 |
| H | -2.74791550 | 0.71246450  | -0.83467977 |
| H | -1.56526499 | -3.60096521 | 0.11908372  |
| H | -0.03290898 | -3.56709225 | -0.12494189 |
| H | -1.99676624 | 0.59456309  | 2.06883367  |
| H | -2.12820545 | -0.78257087 | 2.82041353  |
| H | 1.89783682  | -2.01664652 | -1.82949558 |
| H | 2.60177287  | -1.50338961 | -0.53369354 |
| O | 1.27082660  | 1.21740356  | -0.22051319 |
| O | -1.23469057 | 1.56618802  | 0.28657274  |
| C | 0.96335552  | 2.51085929  | -0.05258382 |
| C | -0.57394252 | 2.72459360  | 0.19268856  |
| O | 1.75399207  | 3.41062285  | -0.07820738 |
| O | -1.06332706 | 3.81392694  | 0.28034808  |

[Eu(oxalate)(H<sub>2</sub>O)<sub>7</sub>]<sup>+</sup> B3LYP/6-311++G\*\* Total energy: -1622.984020

|    |             |             |             |
|----|-------------|-------------|-------------|
| Eu | -0.29367660 | -0.58284006 | -0.00606893 |
| O  | -0.32173461 | -0.21771072 | -2.61502375 |
| O  | 3.55071745  | -0.36741567 | 0.52096681  |
| O  | 1.30848467  | -1.03004992 | 1.99951757  |
| O  | -2.73758177 | -0.16821332 | -1.23259622 |
| O  | -0.61038678 | -3.17687941 | -0.07716921 |
| O  | -1.92352463 | -0.34239075 | 2.06075133  |
| O  | 1.81354338  | -1.97255371 | -0.93109050 |
| H  | -1.24890436 | -0.09838983 | -2.86312375 |
| H  | 0.20920447  | 0.26818502  | -3.25512926 |
| H  | 4.49665670  | -0.21944979 | 0.63306605  |
| H  | 3.14961170  | 0.47431485  | 0.23201898  |
| H  | 1.19172516  | -1.07548253 | 2.95325981  |
| H  | 2.25247143  | -0.85981696 | 1.82481937  |
| H  | -3.59535783 | -0.60242415 | -1.30140345 |
| H  | -2.90462869 | 0.73077797  | -0.91104441 |
| H  | -1.19834010 | -3.92652560 | 0.06052968  |
| H  | 0.27391991  | -3.52891145 | -0.24956640 |
| H  | -2.21030086 | 0.57863736  | 2.12027022  |
| H  | -2.33235083 | -0.81362729 | 2.79434506  |
| H  | 1.99133508  | -2.08329578 | -1.87182496 |
| H  | 2.63922581  | -1.63448811 | -0.53120548 |
| O  | 1.43629377  | 1.32569615  | -0.15147675 |
| O  | -1.32010654 | 1.76278244  | 0.23185831  |
| C  | 1.28764812  | 2.54848560  | -0.07432902 |
| C  | -0.81154430 | 2.88466212  | 0.19001241  |
| O  | 1.84687878  | 3.58821430  | -0.07261858 |
| O  | -1.01225498 | 4.04446454  | 0.24916225  |

[Am(oxalate)(H2O)9]+ B3LYP/6-311++G\*\* Total energy: -1660.999337

|    |             |             |             |
|----|-------------|-------------|-------------|
| Am | 0.00053897  | -0.46058028 | -0.06500160 |
| O  | 0.98119315  | 0.47182868  | -2.41675145 |
| O  | 2.55176092  | -0.95688058 | -0.09856052 |
| O  | 0.78465908  | -0.74762546 | 2.45207723  |
| O  | -2.10553750 | -1.35626050 | -1.24380652 |
| O  | 0.04513378  | -2.91276166 | 0.97885914  |
| O  | -1.99480441 | -0.42701653 | 1.57301729  |
| O  | 0.50796050  | -2.17324253 | -2.08624916 |
| H  | 0.44704772  | 1.18779708  | -2.78709111 |
| H  | 1.86793317  | 0.83789506  | -2.29691144 |
| H  | 3.02357763  | -1.78270660 | -0.24793454 |
| H  | 3.05312547  | -0.44721076 | 0.57762248  |
| H  | 0.18476051  | -0.30879140 | 3.06886415  |
| H  | 1.66190564  | -0.32001450 | 2.57558308  |
| H  | -2.13704043 | -1.78813568 | -2.10378314 |
| H  | -2.91760246 | -0.81890604 | -1.12933757 |
| H  | -0.43201890 | -3.74839625 | 0.93337346  |
| H  | 0.41085285  | -2.82345275 | 1.87076860  |
| H  | -2.76629039 | 0.02148662  | 1.15873585  |
| H  | -2.34946246 | -1.18769172 | 2.04668363  |
| H  | 0.89061215  | -1.64691727 | -2.80276513 |
| H  | 0.80720964  | -3.08213093 | -2.19719652 |
| O  | 1.09706814  | 1.46693097  | 0.55551518  |
| O  | -1.21307294 | 1.41765266  | -0.55774810 |
| C  | 0.61363734  | 2.68802849  | 0.35691717  |
| C  | -0.81767747 | 2.65753689  | -0.27367267 |
| O  | 1.18734026  | 3.71039470  | 0.62365985  |
| O  | -1.46990702 | 3.64803518  | -0.46683798 |
| H  | -2.98655052 | 1.25589900  | -0.54136489 |
| O  | -3.70811550 | 0.62992458  | -0.29192653 |
| H  | -4.55083750 | 1.09326297  | -0.35016450 |
| H  | 2.52284965  | 1.30980264  | 1.53861611  |
| O  | 3.10109232  | 0.65020923  | 2.00073232  |
| H  | 3.81461450  | 1.11660722  | 2.44990960  |

[Eu(oxalate)(H2O)9]+ B3LYP/6-311++G\*\* Total energy: -1775.941980

|    |             |             |             |
|----|-------------|-------------|-------------|
| Eu | 0.01627761  | -0.54858954 | -0.07955913 |
| O  | 0.99910365  | 0.37324549  | -2.39026848 |
| O  | 2.53747515  | -0.99252768 | -0.11228018 |
| O  | 0.79994554  | -0.82988212 | 2.43070445  |
| O  | -2.07831923 | -1.41790629 | -1.22836515 |
| O  | -0.03579372 | -2.92297735 | 0.98655855  |
| O  | -1.94537727 | -0.48210754 | 1.57520561  |
| O  | 0.56774386  | -2.25373520 | -2.04065753 |
| H  | 0.46576424  | 1.08032684  | -2.77743764 |
| H  | 1.88218694  | 0.74402523  | -2.26084197 |

|   |             |             |             |
|---|-------------|-------------|-------------|
| H | 3.01938786  | -1.79666205 | -0.32955365 |
| H | 3.05204458  | -0.50906617 | 0.57154523  |
| H | 0.18520548  | -0.37463514 | 3.02030235  |
| H | 1.67408208  | -0.40540857 | 2.57078091  |
| H | -2.13174106 | -1.85137040 | -2.08567876 |
| H | -2.88652400 | -0.87841601 | -1.10197566 |
| H | -0.39535640 | -3.81088850 | 0.89353248  |
| H | 0.36816418  | -2.84166482 | 1.86280949  |
| H | -2.71217092 | -0.01046029 | 1.18543658  |
| H | -2.30594822 | -1.27899339 | 1.98009094  |
| H | 0.92467387  | -1.73456959 | -2.77481766 |
| H | 0.73208677  | -3.18456805 | -2.22261056 |
| O | 1.09390588  | 1.42201691  | 0.57609812  |
| O | -1.18984347 | 1.36028120  | -0.59218277 |
| C | 0.59103966  | 2.61791565  | 0.38346616  |
| C | -0.82480174 | 2.59013358  | -0.29507300 |
| O | 1.13432730  | 3.65240347  | 0.68835174  |
| O | -1.46627829 | 3.58971108  | -0.49265577 |
| H | -3.00433018 | 1.20861069  | -0.55992002 |
| O | -3.70197346 | 0.57112737  | -0.28799770 |
| H | -4.55739412 | 1.01011801  | -0.35157847 |
| H | 2.53801417  | 1.25300817  | 1.56039444  |
| O | 3.11901574  | 0.58528447  | 2.00271224  |
| H | 3.83532420  | 1.04209815  | 2.45674734  |

[Am(dipicolinate)(H<sub>2</sub>O)<sub>6</sub>]<sup>+</sup> B3LYP/6-311++G\*\* Total energy: -1678.758122

|    |             |             |             |
|----|-------------|-------------|-------------|
| Am | -0.51753586 | 0.40257090  | 0.34169376  |
| O  | -0.95636724 | -0.94690907 | 2.39279908  |
| O  | 0.71079847  | 0.68928175  | 3.83383432  |
| O  | -0.80767929 | 2.21011790  | 2.15149097  |
| O  | -3.07549657 | 0.89059566  | -2.35876715 |
| O  | -1.03975241 | 2.33560222  | -1.20652698 |
| O  | -3.07953809 | 0.50344860  | 0.33798617  |
| H  | -1.62749123 | -1.56390867 | 2.70270633  |
| H  | -0.42855283 | -0.63365887 | 3.16112736  |
| H  | 1.16447138  | 0.71713394  | 4.68413468  |
| H  | 1.38993105  | 0.67890479  | 3.12020744  |
| H  | -0.84496636 | 3.17219744  | 2.11015514  |
| H  | -0.32229658 | 1.96507850  | 2.96811011  |
| H  | -2.51267754 | 0.08289857  | -2.40927203 |
| H  | -3.65439022 | 0.90721337  | -3.12928229 |
| H  | -0.54620590 | 3.04481388  | -1.63333025 |
| H  | -1.78203156 | 2.08203484  | -1.80141265 |
| H  | -3.69714749 | 0.89772344  | 0.96371741  |
| H  | -3.46120365 | 0.59302437  | -0.56012356 |
| C  | 2.54928395  | -0.88321911 | -0.30582902 |
| C  | 3.58379289  | -1.59266160 | -0.90612439 |

|   |             |             |             |
|---|-------------|-------------|-------------|
| C | 3.30313004  | -2.31330890 | -2.06782943 |
| C | 2.01009675  | -2.30873740 | -2.59186447 |
| C | 1.03234825  | -1.57561212 | -1.92748715 |
| C | -0.40495843 | -1.45879475 | -2.39003595 |
| C | 2.69341119  | -0.08672918 | 0.97449431  |
| N | 1.31095090  | -0.88297814 | -0.81539757 |
| O | 1.56787549  | 0.52014549  | 1.32310546  |
| O | 3.72697264  | -0.05495353 | 1.60019898  |
| O | -1.14654798 | -0.74901208 | -1.55457339 |
| O | -0.78971635 | -1.94521670 | -3.42743464 |
| H | 4.56924658  | -1.57023446 | -0.45879326 |
| H | 4.08738760  | -2.87613885 | -2.56020487 |
| H | 1.74393755  | -2.85107064 | -3.49015998 |

[Eu(dipicolinate)(H<sub>2</sub>O)<sub>6</sub>]<sup>+</sup> B3LYP/6-311++G\*\* Total energy: -1793.699026

|    |             |             |             |
|----|-------------|-------------|-------------|
| Eu | -0.63031399 | 0.47352075  | 0.39966502  |
| O  | -0.94519877 | -0.92367632 | 2.39840023  |
| O  | 0.64384595  | 0.77094885  | 3.86285402  |
| O  | -0.97923396 | 2.19203430  | 2.21100920  |
| O  | -3.08151249 | 1.01939364  | -2.32868776 |
| O  | -0.93328333 | 2.32231603  | -1.20640836 |
| O  | -3.12343146 | 0.73129873  | 0.37602375  |
| H  | -1.44980269 | -1.70073464 | 2.66096595  |
| H  | -0.43996637 | -0.59214014 | 3.17289282  |
| H  | 1.10354100  | 0.81730914  | 4.70879939  |
| H  | 1.31585276  | 0.80080718  | 3.14416167  |
| H  | -1.27033011 | 3.10884544  | 2.24353949  |
| H  | -0.46997934 | 1.99774729  | 3.02586342  |
| H  | -2.59000461 | 0.16679582  | -2.34355344 |
| H  | -3.64937441 | 1.05337303  | -3.10680407 |
| H  | -0.45861750 | 3.10247026  | -1.51206535 |
| H  | -1.67524312 | 2.13971981  | -1.82532469 |
| H  | -3.79441409 | 0.93131956  | 1.03618659  |
| H  | -3.51557085 | 0.83164338  | -0.51552326 |
| C  | 2.43124114  | -0.77985611 | -0.26064344 |
| C  | 3.46735697  | -1.48760800 | -0.86079733 |
| C  | 3.17823476  | -2.23862198 | -2.00100095 |
| C  | 1.87687664  | -2.26613980 | -2.50437396 |
| C  | 0.89949519  | -1.53471231 | -1.83777396 |
| C  | -0.54852534 | -1.44215807 | -2.26880770 |
| C  | 2.57570956  | 0.05871842  | 0.99111981  |
| N  | 1.18598510  | -0.81450191 | -0.74771643 |
| O  | 1.45327293  | 0.67506652  | 1.32101982  |
| O  | 3.60822900  | 0.11298776  | 1.61969222  |
| O  | -1.28282519 | -0.73335268 | -1.42846397 |
| O  | -0.95358415 | -1.94263624 | -3.29331500 |
| H  | 4.46125592  | -1.44094857 | -0.43434058 |

|   |            |             |             |
|---|------------|-------------|-------------|
| H | 3.96299921 | -2.79970293 | -2.49466124 |
| H | 1.60903059 | -2.83226237 | -3.38734871 |

[Am(dipicolinate)(H2O)8]+ B3LYP/6-311++G\*\* Total energy: -1831.723315

|    |             |             |             |
|----|-------------|-------------|-------------|
| Am | -0.06661727 | -0.11873810 | -0.66332505 |
| C  | -0.14609280 | 1.52850975  | 2.30755194  |
| C  | -0.02915292 | 1.81219826  | 3.66509333  |
| H  | -0.28995145 | 2.80010734  | 4.02262178  |
| C  | 0.42405114  | 0.80381759  | 4.51592056  |
| H  | 0.52624982  | 0.99333681  | 5.57812125  |
| C  | 0.74671889  | -0.44905538 | 3.99396349  |
| H  | 1.10474036  | -1.26149832 | 4.61331016  |
| C  | 0.59986756  | -0.65234050 | 2.62500398  |
| C  | 0.91513194  | -1.96448631 | 1.93058798  |
| C  | -0.61509265 | 2.53655932  | 1.27447895  |
| N  | 0.16166666  | 0.32099964  | 1.81480440  |
| O  | -0.62199850 | 2.04786860  | 0.05353963  |
| O  | -0.93853684 | 3.66142385  | 1.58959213  |
| O  | 0.68463659  | -1.92321226 | 0.63638045  |
| O  | 1.33405122  | -2.92127315 | 2.54564968  |
| O  | 2.50442737  | 0.53506602  | -0.43167999 |
| H  | 2.97959125  | -0.22423974 | -0.79908349 |
| H  | 3.00222685  | 0.84272137  | 0.33500413  |
| O  | 1.68584493  | -1.43215085 | -2.17908326 |
| O  | 0.82035709  | 1.42800389  | -2.55252615 |
| H  | 1.69777606  | 1.76317242  | -2.32889606 |
| H  | 0.25398659  | 2.21071598  | -2.71097795 |
| O  | -2.09125033 | 0.65942777  | -2.20687520 |
| H  | -2.32516305 | 0.20251200  | -3.02348275 |
| O  | -2.53390208 | -0.58219552 | 0.21572621  |
| H  | -2.87607837 | -0.60114859 | 1.11726666  |
| H  | -3.09225341 | 0.02425627  | -0.29190344 |
| O  | -1.21258590 | -2.19406293 | -1.72946315 |
| H  | -2.02745257 | -2.40782098 | -1.25748837 |
| H  | -0.65440467 | -2.99822121 | -1.70327941 |
| H  | -1.09267271 | 3.14693882  | -1.26752826 |
| O  | -1.25130920 | 3.22519471  | -2.23988094 |
| H  | -1.55178705 | 4.11969283  | -2.43333265 |
| H  | 0.95744275  | -3.41837423 | -0.29015614 |
| O  | 0.94209874  | -3.83132417 | -1.18802346 |
| H  | 1.23294308  | -4.74653027 | -1.11280978 |
| H  | -2.05264821 | 1.62247941  | -2.40491038 |
| H  | 1.64768183  | -2.40412423 | -2.03220393 |
| H  | 1.75252887  | -1.28130698 | -3.12904181 |

[Eu(dipicolinate)(H2O)8]+ B3LYP/6-311++G\*\* Total energy: -1946.664275

|    |             |             |             |
|----|-------------|-------------|-------------|
| Eu | -0.06821150 | -0.13155241 | -0.76469939 |
|----|-------------|-------------|-------------|

|   |             |             |             |
|---|-------------|-------------|-------------|
| C | -0.11968064 | 1.52137190  | 2.18551939  |
| C | 0.00187123  | 1.80723634  | 3.54234281  |
| H | -0.24314704 | 2.80003307  | 3.89776335  |
| C | 0.43447458  | 0.79196885  | 4.39597887  |
| H | 0.53909743  | 0.98201653  | 5.45783657  |
| C | 0.72721136  | -0.47035204 | 3.87856963  |
| H | 1.06020633  | -1.29063461 | 4.50168501  |
| C | 0.57792893  | -0.67341875 | 2.50971867  |
| C | 0.84288613  | -1.99757616 | 1.81569816  |
| C | -0.59268149 | 2.52299905  | 1.14745359  |
| N | 0.17003657  | 0.30925300  | 1.69702840  |
| O | -0.63514065 | 2.01831624  | -0.06407041 |
| O | -0.89069599 | 3.65855134  | 1.45194635  |
| O | 0.57254781  | -1.96045111 | 0.53116493  |
| O | 1.25918357  | -2.96004991 | 2.42503593  |
| O | 2.42676290  | 0.53679036  | -0.47733765 |
| H | 2.95389187  | -0.19082254 | -0.83653562 |
| H | 2.89002794  | 0.88084300  | 0.29489850  |
| O | 1.66544694  | -1.40350800 | -2.22904245 |
| O | 0.79105927  | 1.36838941  | -2.63901572 |
| H | 1.66369599  | 1.71985375  | -2.42226037 |
| H | 0.21598854  | 2.14347153  | -2.80759814 |
| O | -2.05436519 | 0.58731429  | -2.27974830 |
| H | -2.27896607 | 0.09382356  | -3.07710482 |
| O | -2.45536973 | -0.62339137 | 0.14258544  |
| H | -2.75627309 | -0.70819938 | 1.05455509  |
| H | -3.06171584 | -0.02099221 | -0.31037911 |
| O | -1.19968886 | -2.13368771 | -1.89799591 |
| H | -2.01337157 | -2.34787757 | -1.42426113 |
| H | -0.65291415 | -2.94525095 | -1.88146784 |
| H | -1.12064898 | 3.10349283  | -1.39028277 |
| O | -1.27197846 | 3.16894407  | -2.36465677 |
| H | -1.56893743 | 4.06092671  | -2.57411256 |
| H | 0.88061589  | -3.43603489 | -0.41352215 |
| O | 0.90773455  | -3.82357077 | -1.32241672 |
| H | 1.19291649  | -4.74149185 | -1.26066363 |
| H | -2.05140384 | 1.54366513  | -2.50541755 |
| H | 1.63273066  | -2.37832654 | -2.09859926 |
| H | 1.74242280  | -1.23532627 | -3.17550398 |

[Am(ADPTZ)(H<sub>2</sub>O)<sub>6</sub>]<sup>3+</sup> B3LYP/6-311++G\*\* Total energy: -1883.780723

|    |             |             |             |
|----|-------------|-------------|-------------|
| Am | 0.22929294  | -0.95038027 | -0.32012878 |
| O  | 0.48904329  | -1.15661854 | 2.26224370  |
| O  | 1.76462930  | -2.95428191 | 0.42925287  |
| O  | -1.12540753 | -2.90916385 | 0.78382586  |
| O  | -0.25113456 | 0.16167047  | -2.59859706 |
| O  | -0.26811482 | -2.74172158 | -2.19823400 |



|   |             |             |             |
|---|-------------|-------------|-------------|
| O | 2.16378851  | -1.17539166 | -2.14102781 |
| H | 0.98397260  | -0.55696388 | 2.83693522  |
| H | -0.17305656 | -1.58654135 | 2.82108451  |
| H | 2.34433800  | -3.56007388 | -0.05291201 |
| H | 2.00177675  | -3.03913477 | 1.36362751  |
| H | -2.07641862 | -3.00365842 | 0.93160609  |
| H | -0.73148480 | -3.76825936 | 0.98954903  |
| H | 0.45121246  | 0.39237756  | -3.22238234 |
| H | -1.02564487 | 0.68348321  | -2.84891668 |
| H | -0.54728654 | -2.46484838 | -3.08228854 |
| H | -0.42132459 | -3.69582901 | -2.15663195 |
| H | 3.00718580  | -0.70730947 | -2.21041267 |
| H | 2.19997635  | -1.89119756 | -2.79026776 |
| N | -2.27177169 | -0.33980777 | -0.42339607 |
| N | -0.34466936 | 1.33371139  | 0.46216352  |
| N | -1.98954851 | 2.97918609  | 0.92615166  |
| N | 0.32620881  | 3.45359363  | 1.28633735  |
| N | 2.24535575  | 0.53480701  | 0.42983114  |
| C | -3.20492262 | -1.18025903 | -0.91255952 |
| C | -4.56196748 | -0.87675526 | -0.94392741 |
| C | -4.98293464 | 0.35472181  | -0.44850758 |
| C | -4.02864458 | 1.24117149  | 0.04482744  |
| C | -2.68756512 | 0.86502787  | 0.03923842  |
| C | -1.62856970 | 1.79038814  | 0.51498392  |
| C | -0.98545223 | 3.80862423  | 1.31691349  |
| C | 0.58910447  | 2.24113829  | 0.86761863  |
| C | 2.00842230  | 1.80423189  | 0.84384869  |
| C | 3.02735749  | 2.66220476  | 1.25198051  |
| C | 4.34276261  | 2.20455468  | 1.24338046  |
| C | 4.59352912  | 0.89648988  | 0.83859796  |
| C | 3.52122230  | 0.10273436  | 0.44394602  |
| N | -1.30023322 | 5.01805801  | 1.74476140  |
| H | -2.84783338 | -2.12697482 | -1.30208778 |
| H | -5.26659205 | -1.59172425 | -1.35079822 |
| H | -6.03267608 | 0.62460967  | -0.45324543 |
| H | -4.30226429 | 2.21484952  | 0.42838366  |
| H | 2.77779932  | 3.66551358  | 1.56958865  |
| H | 5.15263526  | 2.85439838  | 1.55408263  |
| H | 5.59828411  | 0.49205366  | 0.82822125  |
| H | 3.68770312  | -0.92331079 | 0.13652897  |
| H | -0.57761391 | 5.66151043  | 2.03914964  |
| H | -2.26671554 | 5.31417855  | 1.77872956  |

[Eu(ADPTZ)(H<sub>2</sub>O)<sub>6</sub>]<sup>3+</sup> B3LYP/6-311++G\*\* Total energy: -1998.717262

|    |            |             |             |
|----|------------|-------------|-------------|
| Eu | 0.27226863 | -1.08919535 | -0.36880738 |
| O  | 0.45519819 | -1.24201471 | 2.18306685  |
| O  | 1.80517671 | -3.03819324 | 0.36469484  |

|   |             |             |             |
|---|-------------|-------------|-------------|
| O | -1.05944560 | -3.06087207 | 0.72019247  |
| O | -0.19204994 | 0.07665673  | -2.59731369 |
| O | -0.28797868 | -2.78896968 | -2.23070634 |
| O | 2.18853774  | -1.29704362 | -2.16487847 |
| H | 0.92183022  | -0.65527487 | 2.79297239  |
| H | -0.18712972 | -1.73383049 | 2.71231033  |
| H | 2.38268500  | -3.63663176 | -0.12855540 |
| H | 2.04424064  | -3.13801269 | 1.29671954  |
| H | -2.00718582 | -3.16367823 | 0.88076432  |
| H | -0.65710250 | -3.91688145 | 0.92092072  |
| H | 0.52242930  | 0.28367270  | -3.21482584 |
| H | -0.94513319 | 0.62528925  | -2.85390380 |
| H | -0.55731585 | -2.47841151 | -3.10634101 |
| H | -0.45391302 | -3.74139875 | -2.21749302 |
| H | 3.03368395  | -0.82982320 | -2.21112787 |
| H | 2.22730229  | -1.98775015 | -2.84030555 |
| N | -2.24052200 | -0.48705190 | -0.44808520 |
| N | -0.30632099 | 1.21774994  | 0.37600406  |
| N | -1.95277443 | 2.85152382  | 0.86252495  |
| N | 0.36364303  | 3.32648101  | 1.22418599  |
| N | 2.28003644  | 0.39401114  | 0.39749094  |
| C | -3.17760816 | -1.33401069 | -0.91172227 |
| C | -4.53609327 | -1.02997523 | -0.93866724 |
| C | -4.95266479 | 0.20974477  | -0.46331699 |
| C | -3.99281101 | 1.10386449  | 0.00568361  |
| C | -2.65203637 | 0.72618622  | -0.00519815 |
| C | -1.59283158 | 1.65962891  | 0.45139852  |
| C | -0.94659759 | 3.68069145  | 1.24170747  |
| C | 0.62856577  | 2.11279255  | 0.80136883  |
| C | 2.04508067  | 1.66863131  | 0.79552014  |
| C | 3.06183973  | 2.52872507  | 1.20504767  |
| C | 4.37631638  | 2.06732039  | 1.21512956  |
| C | 4.62581260  | 0.75517639  | 0.82586247  |
| C | 3.55358173  | -0.03933064 | 0.42853184  |
| N | -1.26049802 | 4.89921255  | 1.65248295  |
| H | -2.82505133 | -2.28748047 | -1.28800204 |
| H | -5.24344669 | -1.75232633 | -1.32748196 |
| H | -6.00227238 | 0.48001975  | -0.46389132 |
| H | -4.26303800 | 2.08393553  | 0.37529642  |
| H | 2.81360694  | 3.53638083  | 1.50940958  |
| H | 5.18517187  | 2.71759362  | 1.52728305  |
| H | 5.62908889  | 0.34690784  | 0.82926535  |
| H | 3.72059177  | -1.06884557 | 0.13340051  |
| H | -0.53685742 | 5.54285611  | 1.94672659  |
| H | -2.22772931 | 5.19548090  | 1.68666540  |

[Am(6)2(NO3)3] B3LYP/6-311++G\*\* Total energy: -2536.691316

|    |             |             |             |
|----|-------------|-------------|-------------|
| Am | -0.00412597 | 0.00315460  | -0.01887571 |
| O  | 1.56354275  | -0.09812169 | 1.96040502  |
| O  | -0.01163257 | 1.36263963  | 2.21600833  |
| O  | 1.62363026  | 1.26904998  | 3.66056911  |
| N  | 1.07528202  | 0.85393654  | 2.65468806  |
| O  | 1.56703977  | -0.38570266 | -1.95999024 |
| O  | -0.22558452 | 0.73018967  | -2.42704849 |
| O  | 1.23187287  | 0.31765372  | -3.99996132 |
| N  | 0.87312595  | 0.22459044  | -2.84467443 |
| O  | -1.17186246 | -1.66063052 | 1.63256047  |
| O  | -2.39922309 | -0.10409621 | 0.76628525  |
| O  | -3.33256124 | -1.68136207 | 1.95096308  |
| N  | -2.33789552 | -1.16355433 | 1.47470054  |
| C  | 1.24619345  | 5.36318785  | 1.29267286  |
| C  | 0.13371333  | 5.89617279  | 0.38949971  |
| C  | -0.83738251 | 4.79984910  | 0.04934925  |
| C  | -0.35875341 | 3.48805881  | -0.00442504 |
| C  | 1.08701300  | 3.16484556  | 0.21804529  |
| N  | 1.85455053  | 4.14531911  | 0.73685724  |
| C  | 3.23793801  | 3.84647489  | 1.11175654  |
| O  | 1.52521514  | 2.05235922  | -0.09717430 |
| N  | -1.13292588 | 2.43633959  | -0.28259665 |
| N  | -2.41040727 | 2.59321631  | -0.56649205 |
| C  | -2.92047667 | 3.82659724  | -0.55292396 |
| C  | -2.18152154 | 4.96626663  | -0.23932056 |
| H  | 2.03614123  | 6.10897696  | 1.39104435  |
| H  | 0.86027568  | 5.15299791  | 2.29791403  |
| H  | -0.37735700 | 6.72669105  | 0.88239222  |
| H  | 0.56839058  | 6.28710624  | -0.53858321 |
| H  | 3.30339620  | 3.62128545  | 2.18106919  |
| H  | 3.86728773  | 4.70793168  | 0.88069363  |
| H  | 3.57609211  | 2.98022413  | 0.54928177  |
| H  | -3.97472985 | 3.88394331  | -0.79879642 |
| H  | -2.65173557 | 5.94324318  | -0.22342945 |
| C  | -1.56344841 | -5.42408649 | -0.41586832 |
| C  | -0.11664102 | -5.87553923 | -0.61649324 |
| C  | 0.83546184  | -4.79107975 | -0.19445877 |
| C  | 0.41643066  | -3.46314723 | -0.31143955 |
| C  | -0.92070003 | -3.10407239 | -0.88342626 |
| N  | -1.80802384 | -4.10971178 | -1.02819757 |
| C  | -3.17667374 | -3.80086576 | -1.44620708 |
| O  | -1.15333146 | -1.93743665 | -1.22124158 |
| N  | 1.17284193  | -2.42189574 | 0.04418988  |
| N  | 2.39730206  | -2.59933691 | 0.49818094  |
| C  | 2.86153328  | -3.84563961 | 0.61197012  |
| C  | 2.11855056  | -4.98056487 | 0.29093107  |
| H  | -2.24458395 | -6.13591211 | -0.88413757 |

|   |             |             |             |
|---|-------------|-------------|-------------|
| H | -1.81010916 | -5.38120654 | 0.65228134  |
| H | 0.06658251  | -6.79281862 | -0.05176588 |
| H | 0.05369867  | -6.10640102 | -1.67516893 |
| H | -3.83672203 | -3.73833178 | -0.57509256 |
| H | -3.53306331 | -4.58361492 | -2.11849718 |
| H | -3.18057855 | -2.84289822 | -1.95939444 |
| H | 3.87564969  | -3.91908568 | 0.98795088  |
| H | 2.53856201  | -5.97173144 | 0.42137985  |

[Eu(6)2(NO3)3] B3LYP/6-311++G\*\* Total energy: -2651.627614

|    |             |             |             |
|----|-------------|-------------|-------------|
| Eu | -0.07480216 | -0.01828948 | 0.23719983  |
| O  | 1.61793782  | -0.09532550 | 2.08708300  |
| O  | -0.02347925 | 1.27868944  | 2.37734888  |
| O  | 1.62105156  | 1.23972909  | 3.81368909  |
| N  | 1.09466296  | 0.81560421  | 2.80276157  |
| O  | 1.41551591  | -0.50655647 | -1.75778391 |
| O  | -0.25437648 | 0.81192071  | -2.13721778 |
| O  | 1.11065675  | 0.30185449  | -3.76270793 |
| N  | 0.77193298  | 0.20555587  | -2.59894856 |
| O  | -1.18239617 | -1.59279002 | 1.83831297  |
| O  | -2.48052566 | -0.14793711 | 0.89455516  |
| O  | -3.33773398 | -1.69469739 | 2.17334647  |
| N  | -2.37506336 | -1.15938982 | 1.65939003  |
| C  | 1.39519267  | 5.46340204  | 0.92261626  |
| C  | 0.22199722  | 5.89827402  | 0.04539574  |
| C  | -0.80204461 | 4.80158921  | -0.04754879 |
| C  | -0.36615269 | 3.47695916  | 0.04869903  |
| C  | 1.08377080  | 3.13409871  | 0.20741008  |
| N  | 1.91789918  | 4.15234951  | 0.51297813  |
| C  | 3.32277671  | 3.86281422  | 0.80217953  |
| O  | 1.46847591  | 1.97400588  | 0.03600886  |
| N  | -1.18836771 | 2.42714720  | -0.03129678 |
| N  | -2.47830201 | 2.59635510  | -0.23404510 |
| C  | -2.95340702 | 3.83939890  | -0.34403070 |
| C  | -2.16030835 | 4.98080496  | -0.25046288 |
| H  | 2.21076289  | 6.18299614  | 0.83834067  |
| H  | 1.09437041  | 5.42640840  | 1.97739395  |
| H  | -0.22347200 | 6.81130598  | 0.44774798  |
| H  | 0.58352786  | 6.13062395  | -0.96375124 |
| H  | 3.49187528  | 3.82404999  | 1.88320667  |
| H  | 3.94937665  | 4.64283108  | 0.36513293  |
| H  | 3.57931906  | 2.89840120  | 0.37196216  |
| H  | -4.02271438 | 3.90271011  | -0.51087166 |
| H  | -2.59867261 | 5.96887179  | -0.33662616 |
| C  | -1.44364544 | -5.47626556 | -0.80878955 |
| C  | 0.03454427  | -5.82226892 | -0.98309641 |
| C  | 0.90092764  | -4.77401988 | -0.34225361 |

|   |             |             |             |
|---|-------------|-------------|-------------|
| C | 0.42229178  | -3.46208413 | -0.28566723 |
| C | -0.90286880 | -3.08089311 | -0.87029318 |
| N | -1.72664755 | -4.09341067 | -1.21878884 |
| C | -3.08094202 | -3.78758583 | -1.68075395 |
| O | -1.18800228 | -1.89090765 | -1.03456143 |
| N | 1.11266072  | -2.45125069 | 0.24906110  |
| N | 2.31840887  | -2.64622410 | 0.74043690  |
| C | 2.83419405  | -3.87756565 | 0.70670750  |
| C | 2.16547035  | -4.98179513 | 0.18311903  |
| H | -2.05619254 | -6.13382928 | -1.42722303 |
| H | -1.75250414 | -5.62105583 | 0.23431936  |
| H | 0.23745841  | -6.80727212 | -0.55586072 |
| H | 0.27638887  | -5.87565882 | -2.05160375 |
| H | -3.80225003 | -3.91904438 | -0.86764490 |
| H | -3.34023816 | -4.45394802 | -2.50587419 |
| H | -3.11374592 | -2.75433029 | -2.01582676 |
| H | 3.82984761  | -3.96326587 | 1.12694506  |
| H | 2.62673583  | -5.96314947 | 0.18886088  |

[Am(7)2(NO3)3] B3LYP/6-311++G\*\* Total energy: -2536.766921

|    |             |             |             |
|----|-------------|-------------|-------------|
| Am | -0.03257774 | -0.01325003 | 0.14901166  |
| O  | 1.72137158  | -0.16809079 | 1.95338232  |
| O  | 0.17263509  | 1.28068299  | 2.38004323  |
| O  | 1.89975065  | 1.12175542  | 3.70597235  |
| N  | 1.28390199  | 0.76058006  | 2.72525184  |
| O  | 1.55812263  | -0.46929172 | -1.79383447 |
| O  | -0.15342643 | 0.77735995  | -2.23936775 |
| O  | 1.29960082  | 0.33454285  | -3.80758112 |
| N  | 0.91950343  | 0.21770107  | -2.66152501 |
| O  | -1.26572030 | -1.62150226 | 1.78450602  |
| O  | -2.42977155 | -0.06878950 | 0.83305376  |
| O  | -3.42946335 | -1.56320829 | 2.07204674  |
| N  | -2.41311107 | -1.10801336 | 1.59224116  |
| C  | 1.43896011  | 5.57811673  | 0.45717379  |
| C  | 0.20250444  | 5.91275842  | -0.37384646 |
| C  | -0.79943161 | 4.79428711  | -0.29193646 |
| C  | -0.34529713 | 3.49154466  | -0.12122144 |
| C  | 1.12010737  | 3.18348279  | -0.00984501 |
| N  | 1.95277030  | 4.23337960  | 0.14993800  |
| C  | 3.37712035  | 3.98943828  | 0.37906087  |
| O  | 1.51117651  | 2.01376728  | -0.08085946 |
| N  | -1.17444086 | 2.44168478  | -0.06825056 |
| C  | -2.48135113 | 2.70007812  | -0.17503110 |
| N  | -3.02129895 | 3.90979078  | -0.34476705 |
| C  | -2.18278155 | 4.94126492  | -0.40599820 |
| H  | 2.23869009  | 6.28900700  | 0.24465206  |
| H  | 1.21311194  | 5.64465288  | 1.52907120  |

|   |             |             |             |
|---|-------------|-------------|-------------|
| H | -0.23208758 | 6.85158319  | -0.02173058 |
| H | 0.49188656  | 6.06280328  | -1.42095649 |
| H | 3.61571734  | 4.08344844  | 1.44347739  |
| H | 3.96339400  | 4.71605767  | -0.18685438 |
| H | 3.62115152  | 2.98301442  | 0.04994124  |
| H | -3.15228841 | 1.85345586  | -0.10454894 |
| H | -2.62719253 | 5.92413571  | -0.54554510 |
| C | -1.37526027 | -5.45564241 | -1.27419860 |
| C | 0.11666121  | -5.77388668 | -1.34243140 |
| C | 0.90231136  | -4.76525179 | -0.55056638 |
| C | 0.42020289  | -3.46603084 | -0.44519077 |
| C | -0.86845407 | -3.05542858 | -1.09500321 |
| N | -1.64640437 | -4.04185859 | -1.58507986 |
| C | -2.96349429 | -3.71466298 | -2.13159545 |
| O | -1.16432333 | -1.85662038 | -1.17416814 |
| N | 1.07672720  | -2.50432501 | 0.21351335  |
| C | 2.23149370  | -2.84943540 | 0.78999911  |
| N | 2.78379218  | -4.06548772 | 0.75020460  |
| C | 2.12336275  | -5.00726268 | 0.08143847  |
| H | -1.92247913 | -6.05910926 | -1.99975413 |
| H | -1.77478476 | -5.69044225 | -0.27949544 |
| H | 0.29169231  | -6.78560602 | -0.96823771 |
| H | 0.45061082  | -5.75328896 | -2.38682896 |
| H | -3.74815906 | -3.94555512 | -1.40380331 |
| H | -3.13267273 | -4.29693873 | -3.03950658 |
| H | -2.99670216 | -2.65358318 | -2.36333660 |
| H | 2.75034553  | -2.07585644 | 1.34179722  |
| H | 2.57869679  | -5.99456597 | 0.05050420  |

[Eu(7)2(NO3)3] B3LYP/6-311++G\*\* Total energy: -2651.705217

|    |             |             |             |
|----|-------------|-------------|-------------|
| Eu | -0.07564256 | -0.02148126 | 0.26212141  |
| O  | 1.69788140  | -0.15670650 | 2.00008403  |
| O  | 0.07548194  | 1.19321480  | 2.44912268  |
| O  | 1.77710373  | 1.06155089  | 3.80987057  |
| N  | 1.20433690  | 0.71347762  | 2.80098797  |
| O  | 1.38061464  | -0.51688990 | -1.73794047 |
| O  | -0.26847581 | 0.83309427  | -2.10503899 |
| O  | 1.08222962  | 0.30700244  | -3.73749229 |
| N  | 0.74511116  | 0.21165838  | -2.57419562 |
| O  | -1.31500692 | -1.54541279 | 1.81840739  |
| O  | -2.50662248 | -0.07113105 | 0.78750163  |
| O  | -3.48354228 | -1.54543677 | 2.06729339  |
| N  | -2.47762394 | -1.07418668 | 1.58438949  |
| C  | 1.57561367  | 5.53187988  | 0.18695801  |
| C  | 0.30120204  | 5.84554750  | -0.59327409 |
| C  | -0.73478086 | 4.78242469  | -0.35326522 |
| C  | -0.32100881 | 3.47911338  | -0.10288271 |

|   |             |             |             |
|---|-------------|-------------|-------------|
| C | 1.13461266  | 3.12049288  | -0.03792879 |
| N | 2.01576174  | 4.14259811  | -0.02074091 |
| C | 3.44145735  | 3.85864743  | 0.14192653  |
| O | 1.47638450  | 1.93336307  | -0.01183025 |
| N | -1.18147234 | 2.46960295  | 0.07193511  |
| C | -2.48116472 | 2.77254601  | 0.01841086  |
| N | -2.98612401 | 3.98989730  | -0.20389303 |
| C | -2.11621167 | 4.97829456  | -0.39428416 |
| H | 2.38703230  | 6.18326162  | -0.14091291 |
| H | 1.42390024  | 5.70781337  | 1.25972200  |
| H | -0.07367510 | 6.82949036  | -0.30064896 |
| H | 0.52773599  | 5.89159085  | -1.66530228 |
| H | 3.75479747  | 4.04580871  | 1.17429242  |
| H | 4.01610681  | 4.49974872  | -0.52949155 |
| H | 3.62389839  | 2.81495786  | -0.09924410 |
| H | -3.17645341 | 1.95813443  | 0.17716717  |
| H | -2.53220730 | 5.96565641  | -0.58171535 |
| C | -1.19081509 | -5.42353284 | -1.51061278 |
| C | 0.31559502  | -5.67166445 | -1.53112735 |
| C | 1.01840384  | -4.70212580 | -0.62165122 |
| C | 0.47858548  | -3.43432488 | -0.43774078 |
| C | -0.80306865 | -3.02691408 | -1.10344648 |
| N | -1.51322076 | -4.00114999 | -1.71011571 |
| C | -2.81825681 | -3.68344469 | -2.28946344 |
| O | -1.15767062 | -1.84344159 | -1.08594807 |
| N | 1.06985624  | -2.50055759 | 0.31632145  |
| C | 2.21111521  | -2.84798921 | 0.91687332  |
| N | 2.80945506  | -4.03896771 | 0.81756707  |
| C | 2.21753880  | -4.94917543 | 0.04874392  |
| H | -1.67488456 | -5.98298489 | -2.31241592 |
| H | -1.62466231 | -5.76424651 | -0.56167473 |
| H | 0.52014312  | -6.70355587 | -1.23504171 |
| H | 0.69541096  | -5.54698743 | -2.55234162 |
| H | -3.62369606 | -4.00877147 | -1.62281345 |
| H | -2.92007672 | -4.19186725 | -3.25028250 |
| H | -2.88968020 | -2.60857552 | -2.43191730 |
| H | 2.67956469  | -2.09741527 | 1.54064466  |
| H | 2.71201753  | -5.91440116 | -0.03429132 |

[Am(8)2(NO3)3] B3LYP/6-311++G\*\* Total energy: -2536.769124

|    |             |             |             |
|----|-------------|-------------|-------------|
| Am | -0.04061241 | -0.01548813 | 0.18254474  |
| O  | 1.71853926  | -0.18478857 | 1.97824418  |
| O  | 0.16910292  | 1.25741929  | 2.42536134  |
| O  | 1.88628798  | 1.06640539  | 3.75965506  |
| N  | 1.27651582  | 0.72961964  | 2.76687501  |
| O  | 1.54785829  | -0.47536129 | -1.75976014 |
| O  | -0.15955938 | 0.77818991  | -2.20536772 |

|   |             |             |             |
|---|-------------|-------------|-------------|
| O | 1.29343914  | 0.33209112  | -3.77238080 |
| N | 0.91187141  | 0.21523255  | -2.62699529 |
| O | -1.27470145 | -1.61212541 | 1.82958570  |
| O | -2.43517262 | -0.06135275 | 0.87019133  |
| O | -3.43418176 | -1.52923057 | 2.14100531  |
| N | -2.41885606 | -1.09202617 | 1.64325626  |
| C | 1.44665522  | 5.59553063  | 0.29955246  |
| C | 0.17050369  | 5.90010511  | -0.48071756 |
| C | -0.82669367 | 4.78695890  | -0.33053249 |
| C | -0.35663590 | 3.48730347  | -0.13057661 |
| C | 1.10573636  | 3.18390210  | -0.04351258 |
| N | 1.94678614  | 4.23697948  | 0.03307244  |
| C | 3.37662767  | 3.99860441  | 0.22636838  |
| O | 1.49434865  | 2.00944720  | -0.05589117 |
| N | -1.18680332 | 2.44168064  | -0.03158668 |
| C | -2.49225096 | 2.69600345  | -0.11109929 |
| C | -2.95560632 | 4.00023199  | -0.31024881 |
| N | -2.13465602 | 5.04211950  | -0.42713216 |
| H | 2.23440523  | 6.29453482  | 0.01538126  |
| H | 1.27627382  | 5.71230603  | 1.37759134  |
| H | -0.27160599 | 6.83674919  | -0.13673635 |
| H | 0.40148229  | 6.02125045  | -1.54616384 |
| H | 3.65118742  | 4.13671659  | 1.27745615  |
| H | 3.94523178  | 4.69934256  | -0.38812472 |
| H | 3.60854703  | 2.97860532  | -0.06807458 |
| H | -3.16726356 | 1.85647692  | -0.00246162 |
| H | -4.02024612 | 4.19900609  | -0.37645104 |
| C | -1.30728999 | -5.44320136 | -1.41386079 |
| C | 0.18879812  | -5.74703367 | -1.41513342 |
| C | 0.93690807  | -4.75451028 | -0.57156419 |
| C | 0.42908382  | -3.46007301 | -0.45023751 |
| C | -0.84242475 | -3.04696617 | -1.11861922 |
| N | -1.58513904 | -4.02194760 | -1.68199234 |
| C | -2.88615867 | -3.69045354 | -2.26134533 |
| O | -1.16450410 | -1.85074338 | -1.14778360 |
| N | 1.06514591  | -2.51071619 | 0.24598863  |
| C | 2.20386850  | -2.85852454 | 0.84234963  |
| C | 2.70564522  | -4.15868742 | 0.71983704  |
| N | 2.08631258  | -5.10295363 | 0.01409129  |
| H | -1.80789207 | -6.02468168 | -2.18918906 |
| H | -1.75610113 | -5.72178869 | -0.45178983 |
| H | 0.37159895  | -6.75648850 | -1.04271592 |
| H | 0.58078245  | -5.70219067 | -2.43862074 |
| H | -3.69347298 | -3.95441317 | -1.57012420 |
| H | -3.01738816 | -4.24337939 | -3.19354732 |
| H | -2.92411068 | -2.62249561 | -2.45847235 |
| H | 2.70861738  | -2.09848206 | 1.42556019  |



H 3.63469931 -4.43501193 1.20753497

[Eu(8)2(NO3)3] B3LYP/6-311++G\*\* Total energy: -2651.707238

|    |             |             |             |
|----|-------------|-------------|-------------|
| Eu | -0.07494404 | -0.02078507 | 0.25483907  |
| O  | 1.69790121  | -0.16333320 | 1.99589947  |
| O  | 0.07899727  | 1.19097963  | 2.44569120  |
| O  | 1.77282115  | 1.04244077  | 3.81416416  |
| N  | 1.20354766  | 0.70467748  | 2.79966713  |
| O  | 1.39112104  | -0.51325779 | -1.73480515 |
| O  | -0.26865342 | 0.82320073  | -2.10791560 |
| O  | 1.08848529  | 0.30305121  | -3.73661912 |
| N  | 0.75105805  | 0.20804212  | -2.57391933 |
| O  | -1.30973996 | -1.53194834 | 1.83226024  |
| O  | -2.50214759 | -0.06701269 | 0.78872132  |
| O  | -3.47625910 | -1.51821132 | 2.09657743  |
| N  | -2.47110444 | -1.06002238 | 1.59979340  |
| C  | 1.55947413  | 5.53871347  | 0.14100311  |
| C  | 0.25741006  | 5.85093662  | -0.59217281 |
| C  | -0.76878876 | 4.78347029  | -0.34015714 |
| C  | -0.33463351 | 3.47808645  | -0.10145582 |
| C  | 1.11790274  | 3.12704508  | -0.05923214 |
| N  | 1.99829563  | 4.15020256  | -0.07464336 |
| C  | 3.42665999  | 3.86889439  | 0.06091308  |
| O  | 1.46481415  | 1.93983935  | -0.02115330 |
| N  | -1.19179580 | 2.46571927  | 0.07320058  |
| C  | -2.48956095 | 2.76153866  | 0.03629592  |
| C  | -2.91870611 | 4.07310417  | -0.19219145 |
| N  | -2.07056848 | 5.08069465  | -0.38865107 |
| H  | 2.35613382  | 6.19204478  | -0.21736490 |
| H  | 1.44709101  | 5.71806739  | 1.21818046  |
| H  | -0.13433782 | 6.81919688  | -0.27580790 |
| H  | 0.43989192  | 5.91084466  | -1.67213197 |
| H  | 3.75841070  | 4.04462517  | 1.08976366  |
| H  | 3.98753544  | 4.51979747  | -0.61259201 |
| H  | 3.60836269  | 2.82872220  | -0.19585668 |
| H  | -3.18577429 | 1.94772040  | 0.19571313  |
| H  | -3.97818366 | 4.30603085  | -0.21851282 |
| C  | -1.15741688 | -5.42269916 | -1.54744715 |
| C  | 0.34712015  | -5.67881454 | -1.51215655 |
| C  | 1.03450239  | -4.70909939 | -0.59385506 |
| C  | 0.48428385  | -3.43667133 | -0.42806890 |
| C  | -0.78119017 | -3.03105577 | -1.11243583 |
| N  | -1.47346249 | -3.99909622 | -1.74923135 |
| C  | -2.76512617 | -3.67741760 | -2.35408946 |
| O  | -1.14583836 | -1.84869355 | -1.08458433 |
| N  | 1.07227198  | -2.50157284 | 0.32681345  |
| C  | 2.20185602  | -2.84619317 | 0.94184300  |

|   |             |             |             |
|---|-------------|-------------|-------------|
| C | 2.74266345  | -4.12623589 | 0.78126316  |
| N | 2.17365616  | -5.05364365 | 0.01356628  |
| H | -1.61183743 | -5.97743046 | -2.36946056 |
| H | -1.62844927 | -5.76812195 | -0.61797739 |
| H | 0.55127167  | -6.70048330 | -1.18719858 |
| H | 0.77064434  | -5.56644602 | -2.51773880 |
| H | -3.58590918 | -3.99290259 | -1.70120892 |
| H | -2.85203739 | -4.19192290 | -3.31304442 |
| H | -2.82722070 | -2.60310958 | -2.50543178 |
| H | 2.67074841  | -2.09757473 | 1.56805648  |
| H | 3.66241285  | -4.39974760 | 1.28791429  |

[Am(9)2(NO3)3] B3LYP/6-311++G\*\* Total energy: -2878.570127

|    |             |             |             |
|----|-------------|-------------|-------------|
| Am | 0.02442059  | 0.00672176  | -0.08383502 |
| O  | 1.57593072  | 0.12448177  | 1.94136343  |
| O  | -0.15674119 | 1.40012620  | 2.14318998  |
| O  | 1.46367478  | 1.53519332  | 3.60241825  |
| N  | 0.97088598  | 1.03112273  | 2.60295440  |
| O  | 1.62883520  | -0.23857820 | -2.03762800 |
| O  | -0.29800320 | 0.60449719  | -2.53135353 |
| O  | 1.19453431  | 0.32844245  | -4.10103403 |
| N  | 0.85563931  | 0.23526203  | -2.93755483 |
| O  | -0.95189095 | -1.70491577 | 1.66291288  |
| O  | -2.36193625 | -0.34057320 | 0.75709978  |
| O  | -3.09355813 | -1.98330686 | 1.99321569  |
| N  | -2.16539414 | -1.35952839 | 1.49796675  |
| C  | 2.29974176  | 5.06820124  | 1.59991576  |
| C  | 1.44701663  | 6.06883605  | 0.82720853  |
| C  | 0.13561322  | 5.44403354  | 0.41771768  |
| C  | 0.11406967  | 4.07122170  | 0.18971305  |
| C  | 1.34931635  | 3.24763703  | 0.26966550  |
| N  | 2.42599044  | 3.80447976  | 0.86336861  |
| C  | 3.62333489  | 2.99816679  | 1.10407550  |
| O  | 1.38444029  | 2.10873476  | -0.22609833 |
| C  | -2.23379549 | 5.67887569  | -0.15690544 |
| C  | -1.02824555 | 6.22839361  | 0.23952047  |
| H  | 3.30603122  | 5.46345851  | 1.74804621  |
| H  | 1.86893456  | 4.87135275  | 2.58995311  |
| H  | 1.27363717  | 6.95226708  | 1.44706569  |
| H  | 1.99006837  | 6.40390121  | -0.06582754 |
| H  | 3.63595842  | 2.63839852  | 2.13790473  |
| H  | 4.51004670  | 3.60705989  | 0.91554887  |
| H  | 3.61338308  | 2.14156161  | 0.43580855  |
| H  | -0.96695504 | 7.29607894  | 0.41977616  |
| C  | -2.57955294 | -5.14513391 | -0.63926871 |
| C  | -1.40414044 | -6.05704876 | -0.97438962 |
| C  | -0.10476533 | -5.43555691 | -0.52359812 |

|   |             |             |             |
|---|-------------|-------------|-------------|
| C | -0.02354487 | -4.04633697 | -0.50046160 |
| C | -1.14460446 | -3.19135353 | -0.97242422 |
| N | -2.34699479 | -3.78275914 | -1.13453051 |
| C | -3.52112403 | -2.97005869 | -1.45492463 |
| O | -0.95830205 | -1.99157043 | -1.23685098 |
| C | 2.21300465  | -5.68460362 | 0.22830648  |
| C | 1.00677794  | -6.23430286 | -0.16580276 |
| H | -3.49154515 | -5.51446115 | -1.11113396 |
| H | -2.75267929 | -5.11433985 | 0.44405799  |
| H | -1.55086012 | -7.02849064 | -0.49531998 |
| H | -1.37168170 | -6.23387785 | -2.05714751 |
| H | -4.09906682 | -2.76572331 | -0.54793798 |
| H | -4.14328127 | -3.50620847 | -2.17465711 |
| H | -3.19258950 | -2.02586148 | -1.88037638 |
| H | 0.90443485  | -7.31327463 | -0.20513256 |
| N | -2.73386302 | 2.16031844  | -0.75965283 |
| N | -3.22865658 | 3.40795482  | -0.72571582 |
| C | -2.25285891 | 4.29412006  | -0.36254755 |
| C | -1.11397440 | 3.49228393  | -0.18885980 |
| N | -1.48127467 | 2.19078294  | -0.43722599 |
| N | 2.80666028  | -2.14031179 | 0.50977070  |
| N | 1.57802431  | -2.16419025 | 0.10511604  |
| C | 1.19089044  | -3.47114425 | -0.07516401 |
| C | 2.27968256  | -4.28675570 | 0.27048930  |
| N | 3.25973414  | -3.39941973 | 0.61904968  |
| H | 3.05546624  | -6.31001151 | 0.49697518  |
| H | -3.11542402 | 6.29351303  | -0.29111375 |
| C | 4.61509882  | -3.65115164 | 1.07560276  |
| H | 4.60047559  | -4.24301326 | 1.99299546  |
| H | 5.18431752  | -4.17560446 | 0.30537068  |
| H | 5.07279092  | -2.68454217 | 1.27460441  |
| C | -4.62775924 | 3.64766129  | -1.03210951 |
| H | -5.13047474 | 4.09719545  | -0.17343593 |
| H | -4.71971239 | 4.30341788  | -1.90035223 |
| H | -5.07916891 | 2.68278446  | -1.25269857 |

[Eu(9)2(NO3)3] B3LYP/6-311++G\*\* Total energy: -2993.505803

|    |             |             |             |
|----|-------------|-------------|-------------|
| Eu | -0.01941431 | -0.00577390 | 0.07150181  |
| O  | 1.61876540  | 0.15680045  | 2.02419946  |
| O  | -0.16845634 | 1.35659516  | 2.18637955  |
| O  | 1.42596432  | 1.58666091  | 3.66138403  |
| N  | 0.97498117  | 1.04314726  | 2.66511983  |
| O  | 1.57125124  | -0.36577053 | -1.89103456 |
| O  | -0.24696718 | 0.70966721  | -2.33464313 |
| O  | 1.19909474  | 0.33245532  | -3.92592941 |
| N  | 0.85678911  | 0.22832261  | -2.76209695 |
| O  | -0.93080315 | -1.63522610 | 1.76751905  |

|   |             |             |             |
|---|-------------|-------------|-------------|
| O | -2.41430424 | -0.39269043 | 0.81374619  |
| O | -3.05125802 | -2.01301654 | 2.12883264  |
| N | -2.16651683 | -1.36339783 | 1.59589149  |
| C | 2.41434055  | 5.19805001  | 1.20807030  |
| C | 1.55423196  | 6.10113466  | 0.33158547  |
| C | 0.21119086  | 5.46401835  | 0.07149323  |
| C | 0.14932025  | 4.07357818  | 0.02772761  |
| C | 1.36859042  | 3.23492746  | 0.17860092  |
| N | 2.47871053  | 3.83893151  | 0.65935283  |
| C | 3.65789708  | 3.03487006  | 0.98093846  |
| O | 1.36303302  | 2.03868085  | -0.14558920 |
| C | -2.17679358 | 5.68860735  | -0.42088755 |
| C | -0.94179770 | 6.25114012  | -0.15495311 |
| H | 3.43513237  | 5.58071352  | 1.25962679  |
| H | 2.02048353  | 5.16236146  | 2.23238793  |
| H | 1.43156447  | 7.07163841  | 0.81908205  |
| H | 2.06547895  | 6.28168535  | -0.62267807 |
| H | 3.69053327  | 2.81792401  | 2.05366011  |
| H | 4.55670376  | 3.58344203  | 0.69134176  |
| H | 3.60568193  | 2.09605166  | 0.43668204  |
| H | -0.84846388 | 7.33097243  | -0.11773995 |
| C | -2.49921038 | -5.18862437 | -1.05545411 |
| C | -1.27480652 | -5.99868121 | -1.46600482 |
| C | -0.02221558 | -5.40440642 | -0.87004856 |
| C | 0.00695208  | -4.02802970 | -0.66050161 |
| C | -1.13036308 | -3.15567658 | -1.05525420 |
| N | -2.30576231 | -3.76134797 | -1.33640218 |
| C | -3.50025418 | -2.95118277 | -1.57502812 |
| O | -0.99097921 | -1.92622470 | -1.13950078 |
| C | 2.26633886  | -5.68033103 | -0.04395366 |
| C | 1.09978454  | -6.20960011 | -0.56571090 |
| H | -3.37657693 | -5.51781776 | -1.61484740 |
| H | -2.71484236 | -5.32647554 | 0.01231917  |
| H | -1.40009660 | -7.03539037 | -1.14337378 |
| H | -1.19135611 | -6.00923749 | -2.56029816 |
| H | -4.11356446 | -2.90038422 | -0.66946180 |
| H | -4.08155998 | -3.39719540 | -2.38487777 |
| H | -3.19690682 | -1.94428521 | -1.84761840 |
| H | 1.03820229  | -7.27659239 | -0.74971486 |
| N | -2.77911401 | 2.13845823  | -0.55525988 |
| N | -3.24567348 | 3.39438953  | -0.65364899 |
| C | -2.23483212 | 4.29049897  | -0.44672711 |
| C | -1.10638183 | 3.48444846  | -0.22492968 |
| N | -1.51324016 | 2.17268048  | -0.29518635 |
| N | 2.72316651  | -2.18556896 | 0.70889922  |
| N | 1.51613262  | -2.19163824 | 0.24646825  |
| C | 1.18237002  | -3.47593724 | -0.11267187 |

|   |             |             |             |
|---|-------------|-------------|-------------|
| C | 2.28195183  | -4.29891040 | 0.18011214  |
| N | 3.21473369  | -3.43601344 | 0.68288774  |
| H | 3.11729593  | -6.31053318 | 0.18374581  |
| H | -3.05089440 | 6.30481135  | -0.59220269 |
| C | 4.55828232  | -3.70192585 | 1.16494990  |
| H | 4.52886283  | -4.41099316 | 1.99475717  |
| H | 5.17980668  | -4.09951831 | 0.35990214  |
| H | 4.96881075  | -2.75561757 | 1.51067873  |
| C | -4.65175295 | 3.63165879  | -0.92710456 |
| H | -5.10394384 | 4.20253665  | -0.11355241 |
| H | -4.77062936 | 4.17148725  | -1.86886014 |
| H | -5.13396844 | 2.65914376  | -0.99942047 |

[Am(10)(NO3)3] B3LYP/6-311++G\*\* Total energy: -2579.730010

|    |             |             |             |
|----|-------------|-------------|-------------|
| C  | -2.83243710 | 2.61378421  | 2.50913420  |
| N  | -1.34699629 | 0.88199174  | 0.91529393  |
| C  | -0.72139952 | 1.78778793  | 1.68283250  |
| C  | -1.42475844 | 2.68804743  | 2.52002583  |
| C  | 0.72122861  | 1.83941975  | 1.62631232  |
| C  | 1.42450129  | 2.75552832  | 2.44620596  |
| C  | 0.68010758  | 3.64410897  | 3.29372504  |
| C  | -0.68045049 | 3.61337186  | 3.32734582  |
| N  | 1.34690748  | 0.99223738  | 0.79459072  |
| C  | 2.83218431  | 2.73795788  | 2.37331752  |
| O  | -2.54051923 | -0.65527377 | -0.92137475 |
| O  | 2.54059692  | -0.97735956 | -0.56806589 |
| H  | -3.40850655 | 3.28477603  | 3.13908429  |
| H  | 1.22547223  | 4.34723144  | 3.91360476  |
| H  | -1.22588083 | 4.29497253  | 3.97075964  |
| N  | 0.00013697  | -2.97652169 | -2.71556989 |
| O  | 0.00016965  | -3.86972126 | -3.53045875 |
| O  | 0.58796715  | -3.08017222 | -1.57980473 |
| O  | -0.58773062 | -1.85502937 | -2.92272885 |
| N  | -0.44019580 | -2.29521416 | 1.85696817  |
| O  | -1.30809264 | -2.26384952 | 0.91704595  |
| O  | -0.64245881 | -2.87170809 | 2.90688592  |
| O  | 0.64198496  | -1.66112522 | 1.61960903  |
| N  | 0.44021933  | 1.63914131  | -2.45550588 |
| O  | -0.64199694 | 1.46073074  | -1.80243617 |
| O  | 0.64245096  | 2.63189694  | -3.12567069 |
| O  | 1.30818497  | 0.70610826  | -2.33816840 |
| Am | 0.00003758  | -0.80889307 | -0.73795809 |
| C  | -2.66779231 | 0.84990066  | 0.90615747  |
| C  | -3.47254051 | 1.69985703  | 1.69261339  |
| C  | -4.96663794 | 1.56906607  | 1.55310480  |
| C  | -3.26091093 | -0.12801372 | -0.06938733 |
| H  | -5.47092773 | 1.85627018  | 2.47911815  |

|   |             |             |             |
|---|-------------|-------------|-------------|
| C | 2.66770555  | 0.98026938  | 0.76353299  |
| C | 3.47237287  | 1.84125364  | 1.53798435  |
| C | 4.96648362  | 1.69043721  | 1.42058053  |
| C | 3.26092072  | -0.08065182 | -0.12096469 |
| H | 5.47071545  | 2.63887486  | 1.62185498  |
| C | 5.21061429  | -0.94199348 | -1.28744580 |
| H | 6.16042925  | -1.29004555 | -0.87591808 |
| H | 4.54173676  | -1.78566274 | -1.43599537 |
| H | 5.39078807  | -0.45639629 | -2.25196458 |
| N | 4.58908844  | -0.00518099 | -0.35227118 |
| C | -5.21050092 | -1.36853402 | -0.82044714 |
| H | -5.39065933 | -2.28456825 | -0.24861857 |
| N | -4.58907114 | -0.35151069 | 0.02687307  |
| C | -5.35455152 | 0.13721442  | 1.18249823  |
| C | 5.35448828  | 1.19036351  | 0.02867392  |
| H | 6.41153122  | 0.92061463  | 0.01228264  |
| H | 5.20343831  | 1.97842486  | -0.72019219 |
| H | -5.20351027 | -0.53637782 | 2.03579614  |
| H | -6.41157929 | 0.09615157  | 0.91532943  |
| H | 5.31377253  | 0.97221472  | 2.17339491  |
| H | -5.31392545 | 2.25297194  | 0.76898318  |
| H | 3.40818985  | 3.42670297  | 2.98386715  |
| H | -6.16031433 | -0.99063718 | -1.20475471 |
| H | -4.54156794 | -1.59364437 | -1.64694321 |

[Eu(10)(NO3)3] B3LYP/6-311++G\*\* Total energy: -2694.668052

|   |             |             |             |
|---|-------------|-------------|-------------|
| C | -2.83309839 | 2.52114169  | 2.41247314  |
| N | -1.34245062 | 0.77534270  | 0.83874112  |
| C | -0.72070652 | 1.68840153  | 1.60029011  |
| C | -1.42534852 | 2.59308892  | 2.43070933  |
| C | 0.72053342  | 1.74813094  | 1.53489394  |
| C | 1.42508728  | 2.65793531  | 2.35977880  |
| C | 0.68029130  | 3.54616429  | 3.20753783  |
| C | -0.68064069 | 3.51865298  | 3.23762242  |
| N | 1.34236233  | 0.90622029  | 0.69542240  |
| C | 2.83284167  | 2.63326723  | 2.28986623  |
| O | -2.52419436 | -0.78333396 | -0.98374148 |
| O | 2.52428170  | -1.05124928 | -0.68979970 |
| H | -3.41184304 | 3.19682662  | 3.03491670  |
| H | 1.22537408  | 4.24760083  | 3.82960657  |
| H | -1.22579087 | 4.20230569  | 3.87912695  |
| N | 0.00012046  | -3.01520816 | -2.75104880 |
| O | 0.00016348  | -3.90814889 | -3.56580314 |
| O | 0.51957513  | -3.14489454 | -1.58709665 |
| O | -0.51938046 | -1.86800525 | -2.98657055 |
| N | -0.38111237 | -2.32309210 | 1.79701880  |
| O | -1.26911283 | -2.30838591 | 0.87876983  |

|    |             |             |             |
|----|-------------|-------------|-------------|
| O  | -0.55764143 | -2.87801284 | 2.86351085  |
| O  | 0.69463454  | -1.69536032 | 1.51992107  |
| N  | 0.38118785  | 1.57686139  | -2.47772083 |
| O  | -0.69461520 | 1.35827035  | -1.82739315 |
| O  | 0.55769300  | 2.58810807  | -3.12789666 |
| O  | 1.26926898  | 0.66390345  | -2.37893125 |
| Eu | 0.00004491  | -0.87176667 | -0.79528026 |
| C  | -2.66297478 | 0.74597105  | 0.82153389  |
| C  | -3.47002023 | 1.60432937  | 1.59650587  |
| C  | -4.96338040 | 1.48120383  | 1.44388750  |
| C  | -3.25103022 | -0.24084192 | -0.14812493 |
| H  | -5.47467464 | 1.77764872  | 2.36315626  |
| C  | 2.66288821  | 0.88646808  | 0.66780860  |
| C  | 3.46985088  | 1.73682031  | 1.45164243  |
| C  | 4.96322463  | 1.57365588  | 1.34306955  |
| C  | 3.25104341  | -0.16942776 | -0.22606228 |
| H  | 5.47445707  | 2.51623146  | 1.55413582  |
| C  | 5.20100447  | -1.03896613 | -1.38568743 |
| H  | 6.14377701  | -1.40205529 | -0.97079394 |
| H  | 4.52364822  | -1.87347870 | -1.54701756 |
| H  | 5.39420409  | -0.54677853 | -2.34441102 |
| N  | 4.58270763  | -0.10499166 | -0.44600295 |
| C  | -5.20089596 | -1.47528082 | -0.90796868 |
| H  | -5.39409068 | -2.38493113 | -0.33009516 |
| N  | -4.58269066 | -0.45401694 | -0.06390209 |
| C  | -5.35794435 | 0.05001269  | 1.07826903  |
| C  | 5.35787414  | 1.07857331  | -0.04862392 |
| H  | 6.41186832  | 0.79660972  | -0.05688132 |
| H  | 5.22345645  | 1.87397811  | -0.79301769 |
| H  | -5.22354501 | -0.61843022 | 1.93848998  |
| H  | -6.41192121 | 0.01592822  | 0.79818641  |
| H  | 5.29832139  | 0.84780894  | 2.09409135  |
| H  | -5.29846800 | 2.16260785  | 0.65231811  |
| H  | 3.41152069  | 3.31499593  | 2.90574609  |
| H  | -6.14366142 | -1.09540718 | -1.30756806 |
| H  | -4.52348284 | -1.71229788 | -1.72416997 |
